# Supplementary material for: A photo-responsive fluorescent amphiphile for target-specific and image-guided drug delivery applications
Source: Royal Society of Chemistry journal article supplement (doi:10.1039/d2ob01332k), 2022-01-01
Supplement: d2ob01332k1.pdf [file d2ob01332k1.pdf]

## Supporting Information

.....

### **Photo-responsive Fluorescent Amphiphile for Target-specific and Image-guided Drug Delivery Applications**

Subhasis Dey,<sup>a†</sup> Plaboni Sen,<sup>b†</sup> Anjali Patel,<sup>c</sup> BiswaMohan Prusty,<sup>a</sup> Siddhartha Sankar Ghosh,<sup>\*b</sup> and Debasis Manna<sup>\*a</sup>

<sup>a</sup>Department of Chemistry, Indian Institute of Technology Guwahati, Assam 781039, India

<sup>b</sup>Department of Bioscience and Bioengineering, Indian Institute of Technology Guwahati, Assam 781039, India

<sup>c</sup>Centre for the Environment, Indian Institute of Technology Guwahati, Assam 781039, India

## Supporting Information

---

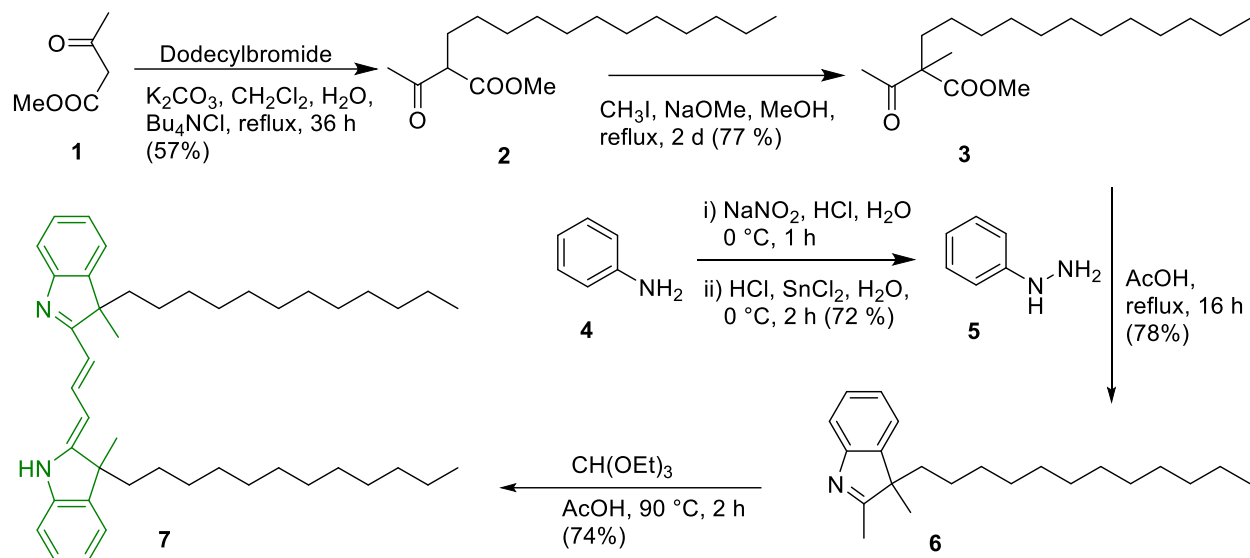

**Scheme S1:** Synthetic routes to Cy3 derivative.

## Supporting Information

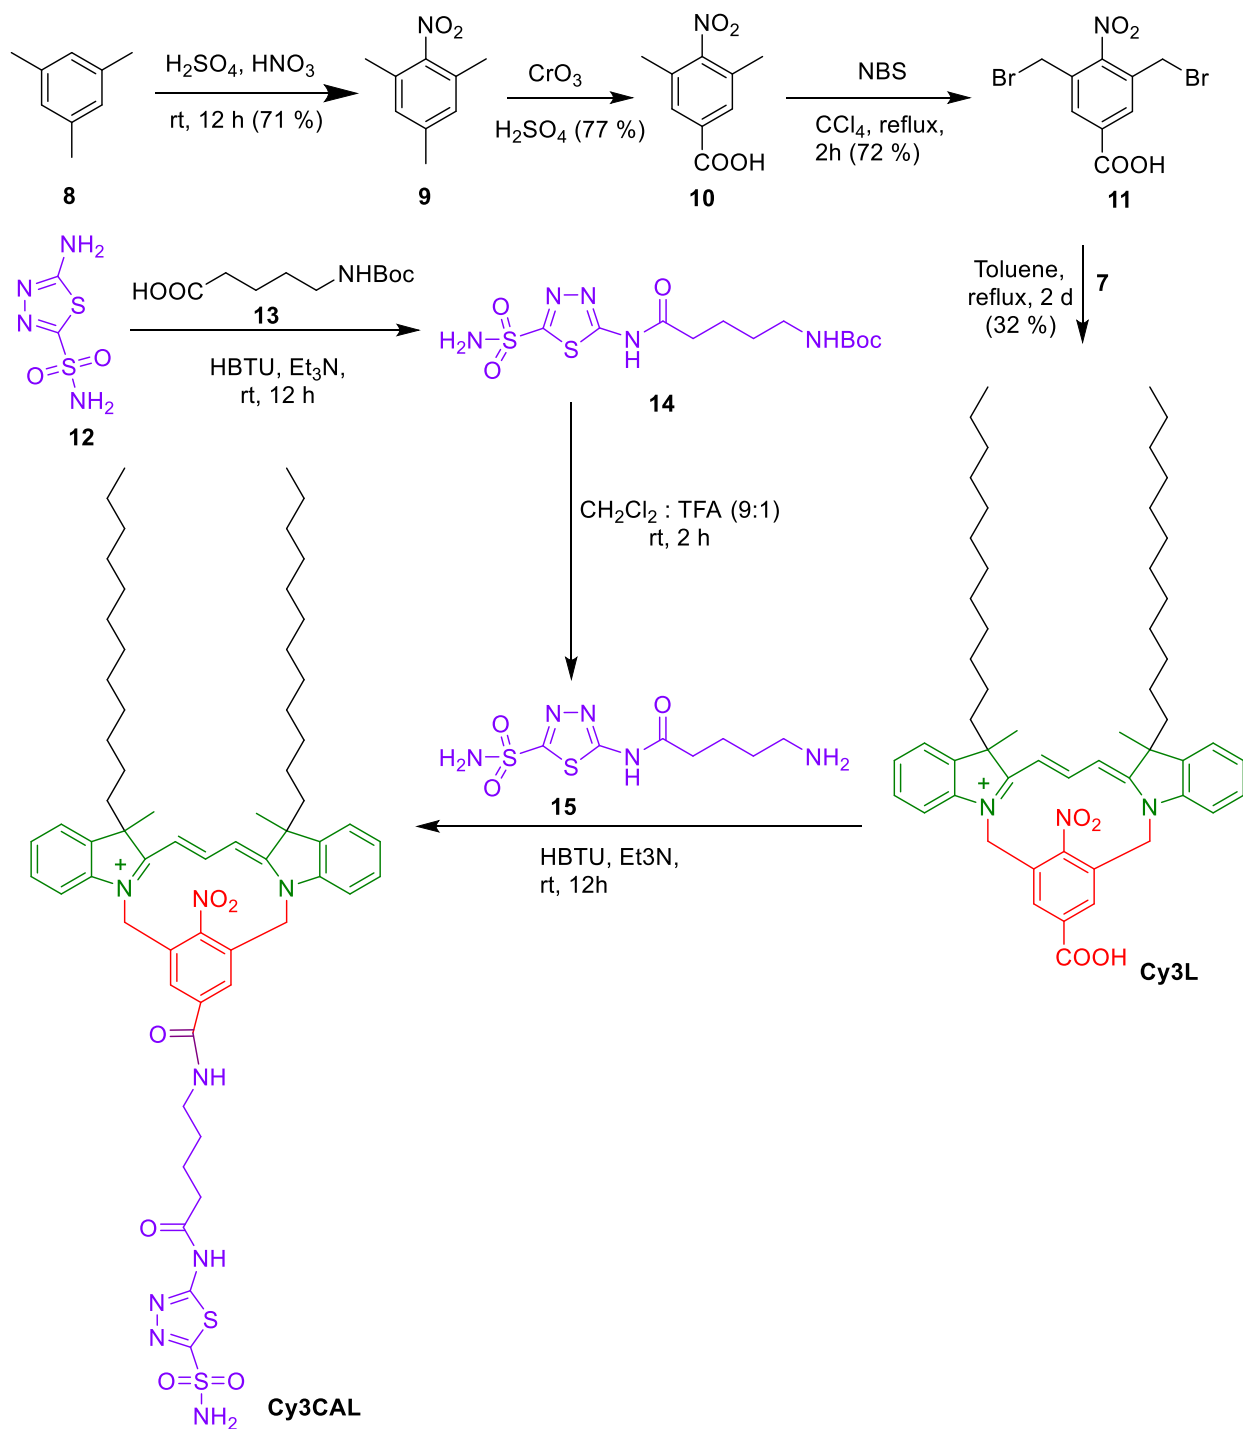

**Scheme S2:** Synthetic routes to macrocyclic photoresponsive fluorescent amphiphiles **Cy3CAL**.

## Supporting Information

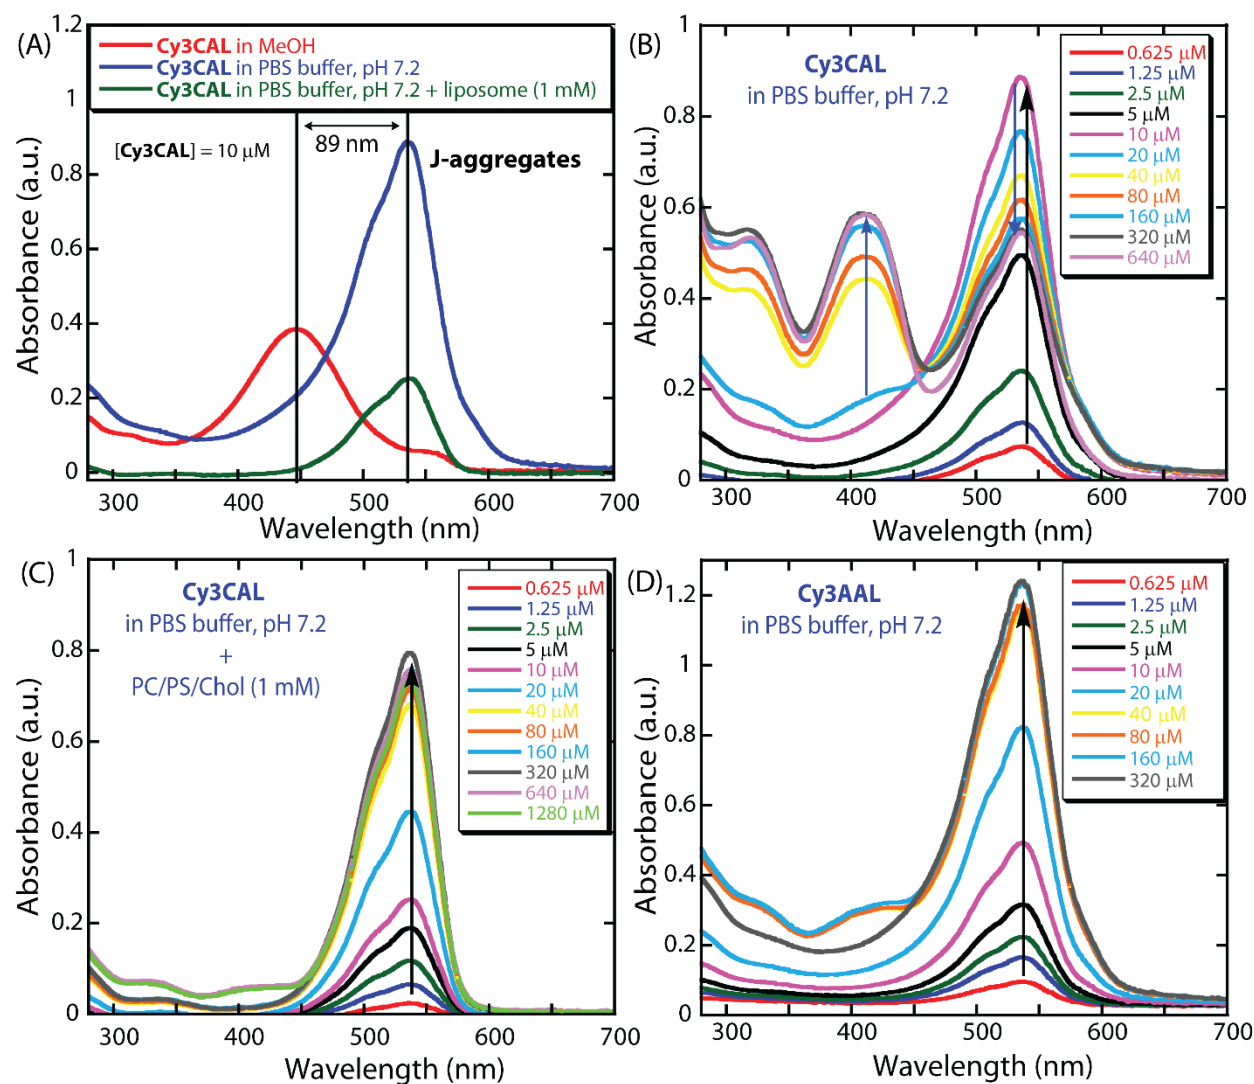

**Fig. S1.** UV-Vis spectra of **Cy3CAL** (10 μM) in MeOH, PBS buffer, pH 7.2, and in the presence of liposomes of PC/PS/Chol (60:20:20) (A). Concentration-dependent UV-Vis spectra of **Cy3CAL** in PBS buffer, pH 7.2 (B). Concentration-dependent UV-Vis spectra of **Cy3CAL** in the presence of liposomes of PC/PS/Chol (60:20:20) (C). Concentration-dependent UV-Vis spectra of **Cy3AAL** in PBS buffer, pH 7.2 (D).

## Supporting Information

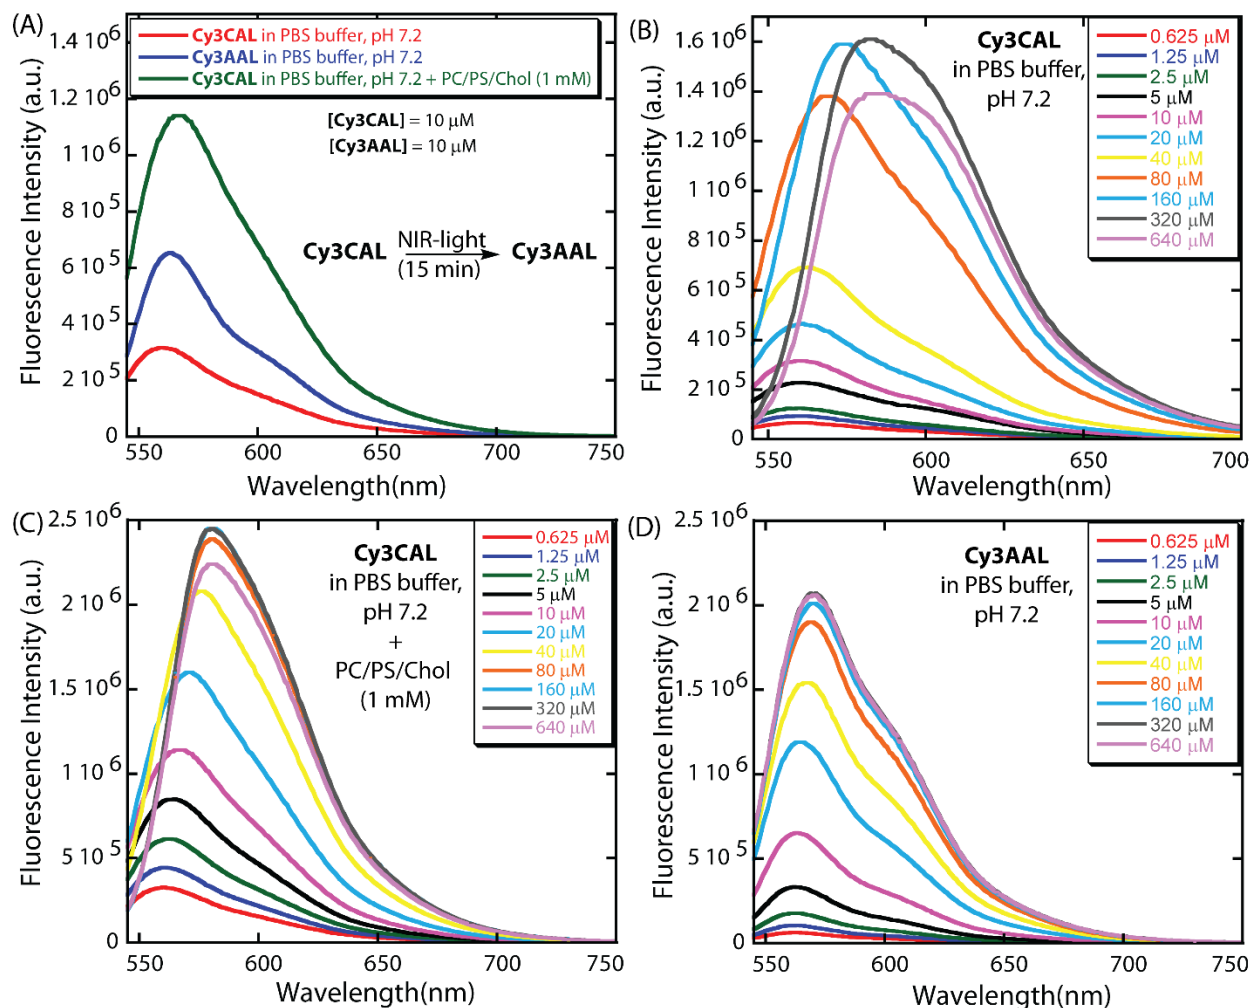

**Fig. S2.** Fluorescence spectra of **Cy3CAL** and **Cy3AAL** (10 μM) in PBS buffer, pH 7.2, and in the presence of liposomes of PC/PS/Chol (60:20:20) (A). Concentration-dependent fluorescence spectra of **Cy3CAL** in PBS buffer, pH 7.2 (B). Concentration-dependent fluorescence spectra of **Cy3CAL** in the presence of liposomes of PC/PS/Chol (60:20:20) (C). Concentration-dependent fluorescence spectra of **Cy3AAL** in PBS buffer, pH 7.2 (D). NIR laser light (808 nm, 1 W cm<sup>-2</sup>) source was used to irradiate the samples for 15 minutes.

## Supporting Information

---

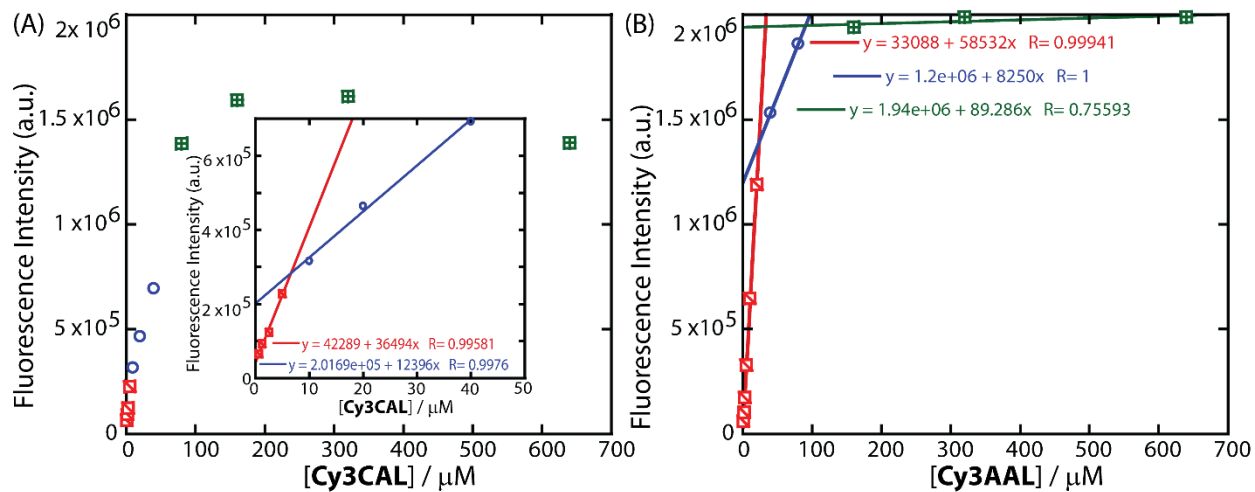

**Fig. S3.** Measurement of the critical aggregation constant of **Cy3CAL** and **Cy3AAL**.

(A) TEM (Cy3CAL)

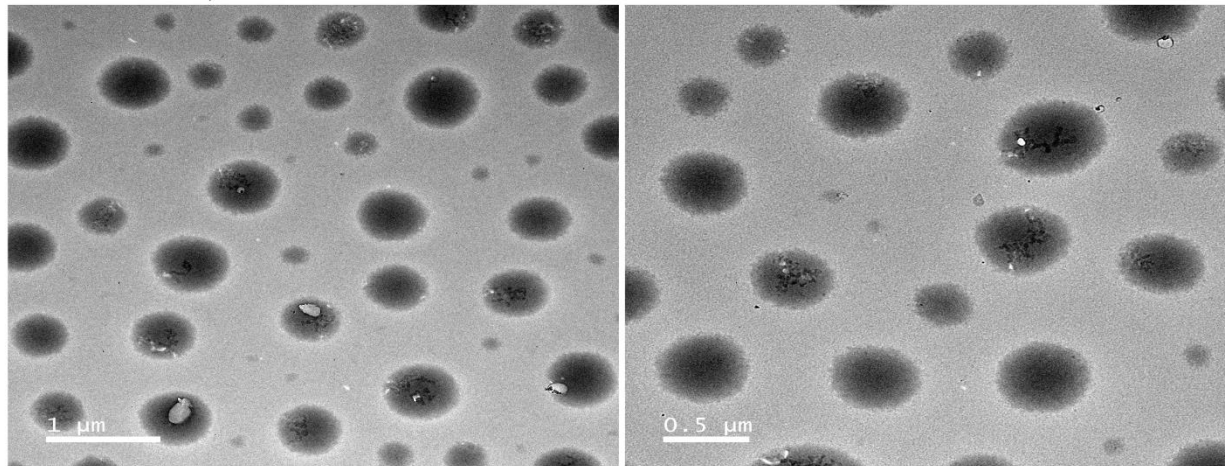

(B) FESEM (Cy3CAL)

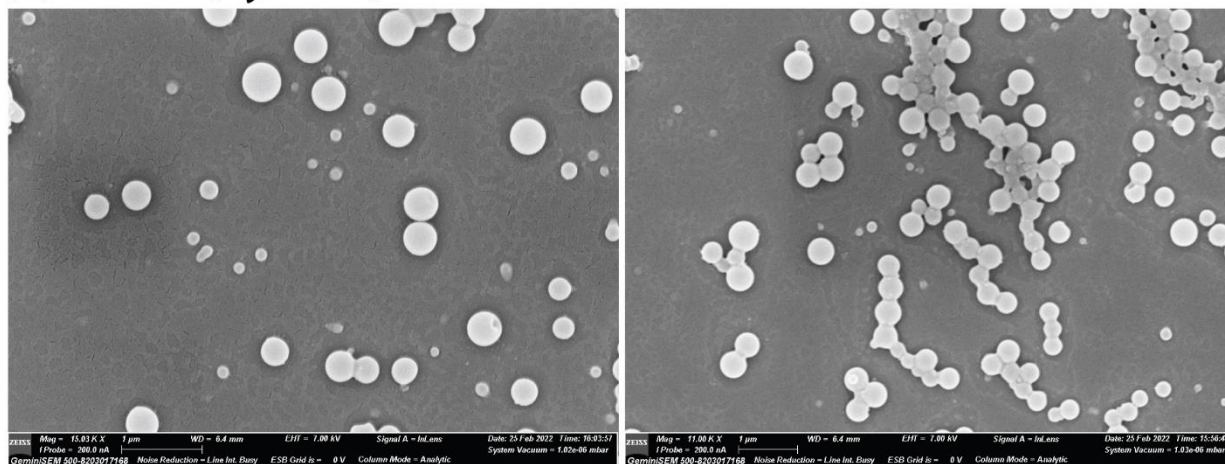

**Fig. S4.** Representative TEM images of **Cy3CAL** before light treatment (A). Representative FESEM images of **Cy3CAL** before light treatment (B).

## Supporting Information

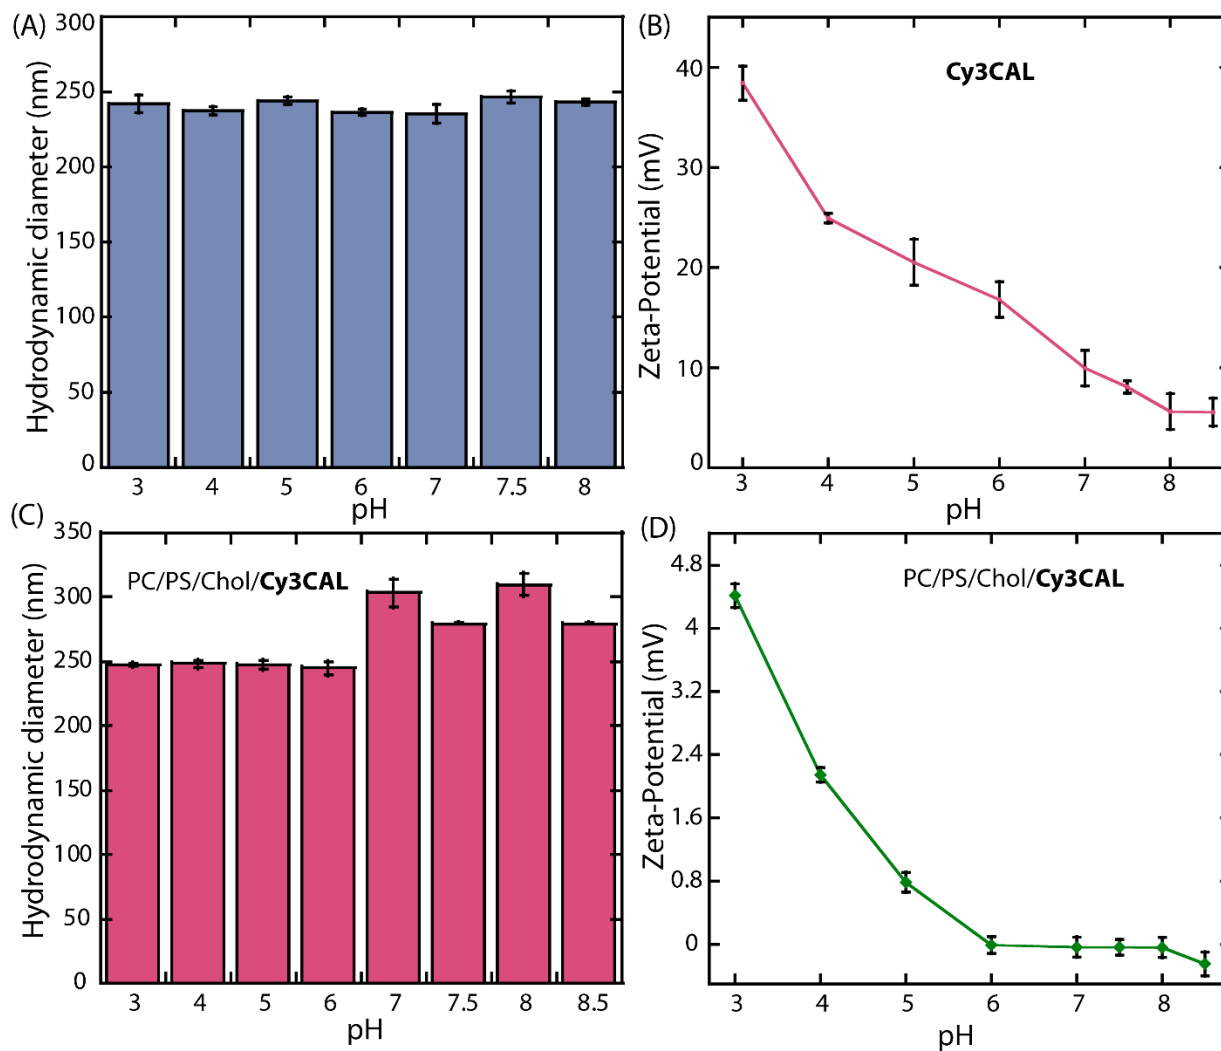

**Fig. S5.** Variation of hydrodynamic diameter (A) and zeta potential (B) of the soluble aggregates of **Cy3CAL** at various pH. Variation of hydrodynamic diameter (C) and zeta potential (D) of **PC/PS/Chol/Cy3CAL** (55/20/20/5) at various pH.



## Supporting Information

---

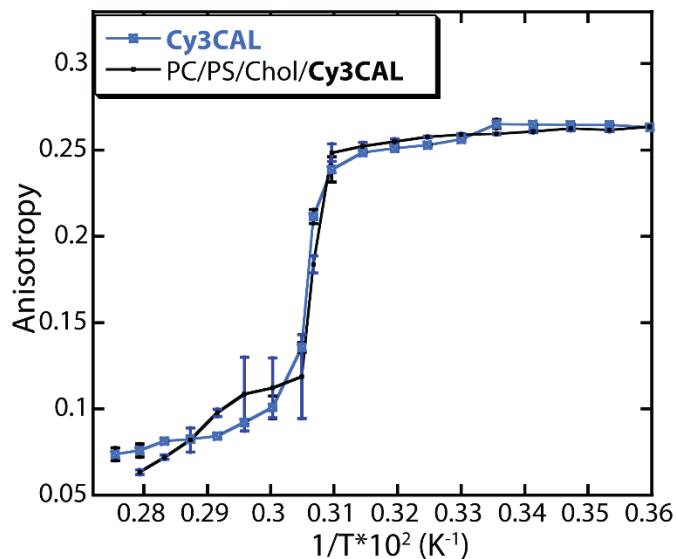

**Fig. S6.** The temperature-dependent fluorescence anisotropy measurement of environment-sensitive 1,6-diphenyl-1,3,5-hexatriene dye incorporated within the water-soluble aggregates.

**NOTE:** The photoreaction of the labile ortho-nitrobenzyl group is initiated by an intramolecular 1,5-H shift yielding aci-nitro protomers as a first intermediate. After that, cyclization to short-lived benzisoxazolidines is generated followed by ring opening yielding an o-nitrosoaldehyde group in the molecule.<sup>1</sup> However, the nitroso group may not be radically active in abstracting the hydrogen radicle from the other benzyl position.

(A) TEM (**Cy3CAL** + light)

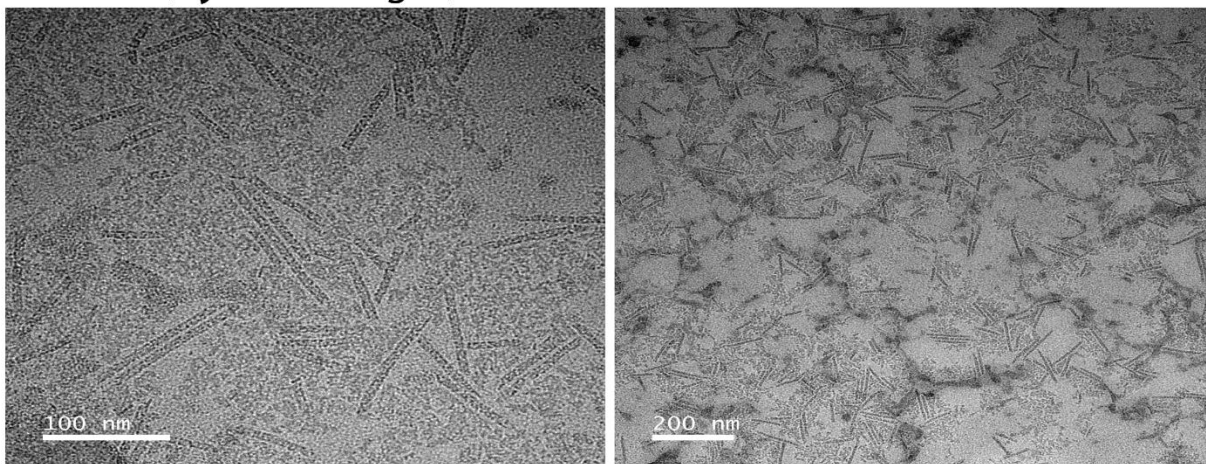

(B) FESEM (**Cy3CAL** + light)

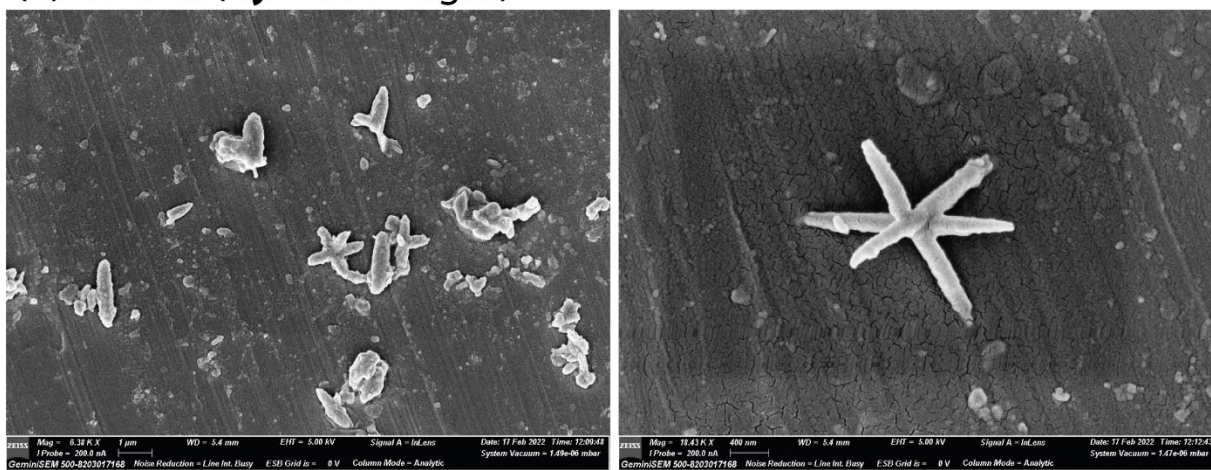

**Fig. S7.** Representative TEM images of **Cy3CAL** after light treatment (A). Representative FESEM images of **Cy3CAL** after light treatment (B).

## Supporting Information

---

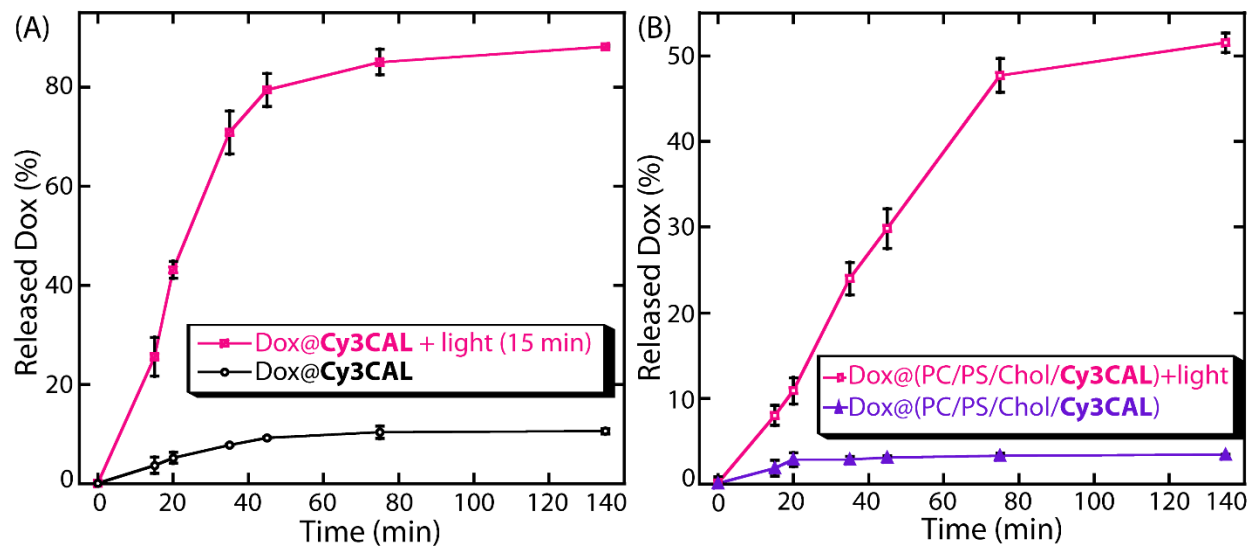

**Fig. S8.** The Dox release profiles of **Cy3CAL** without and with NIR-light treatment (15 min) (A). The Dox release profiles of lipid mixture of PC/PS/Chol/**Cy3CAL** without and with NIR-light treatment (15 min) (B). NIR laser light (808 nm,  $1 \text{ W cm}^{-2}$ ) source was used to irradiate the samples for 15 minutes.

## Supporting Information

---

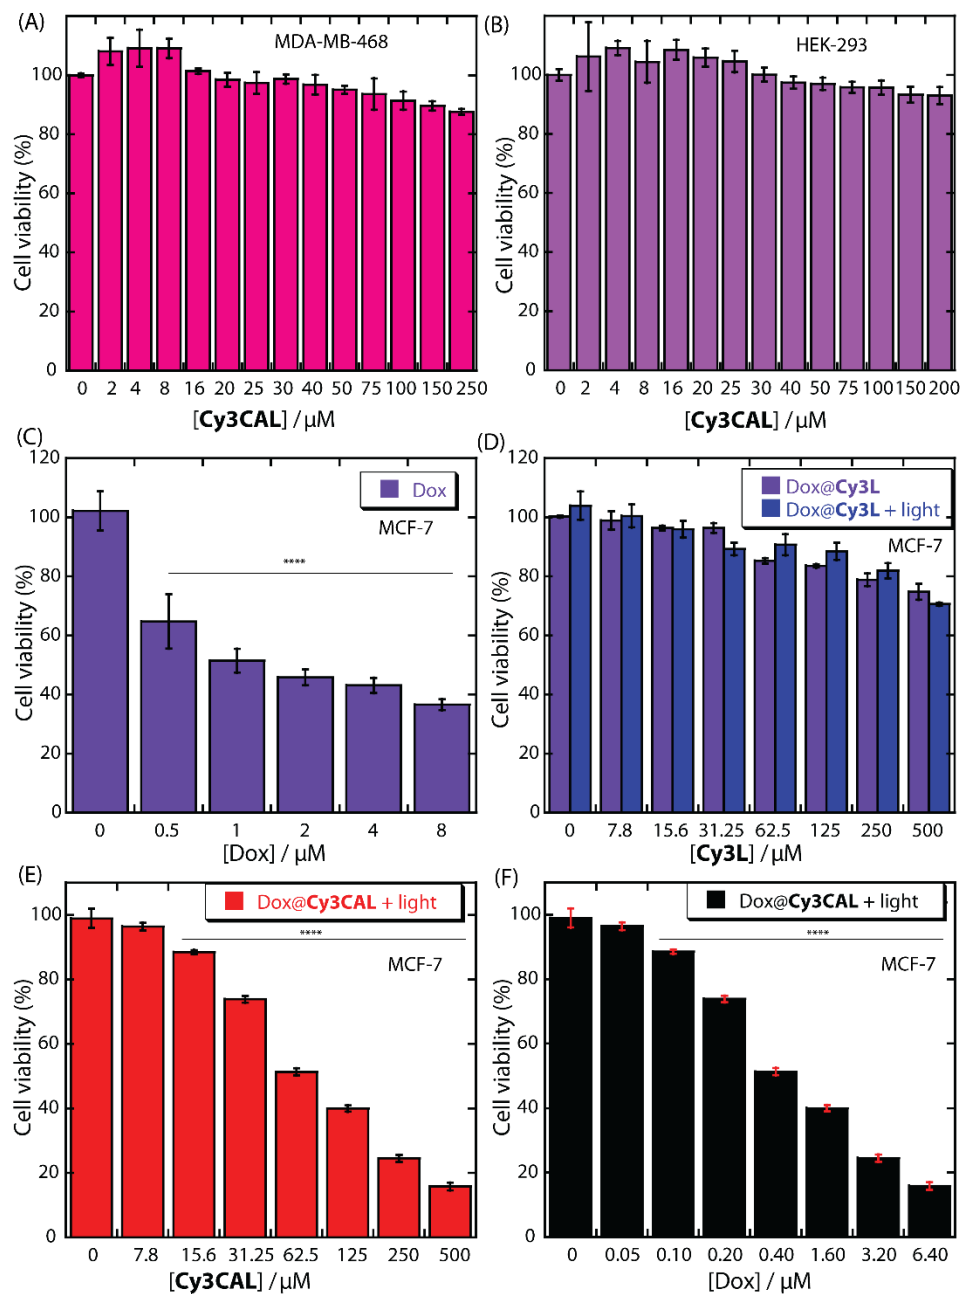

**Fig. S9.** Viabilities of MDA-MB-468 (A) and HEK-293 (B) cells in the presence of **Cy3CAL** at different concentrations. Viabilities of MCF-7 cells in the presence of **Dox** at different concentrations (C). Viabilities of MCF-7 cells in the presence of **Cy3CAL** (before and after light treatment for 15 min) at different concentrations (D). Viability of MCF-7 cells in the presence of **Dox@Cy3CAL** after light treatment with respect to the concentration of **Cy3CAL** (E) and **DOX** (F). NIR laser light (808 nm,  $1 \text{ W cm}^{-2}$ ) source was used to irradiate the samples for 15 minutes.

## Supporting Information

---

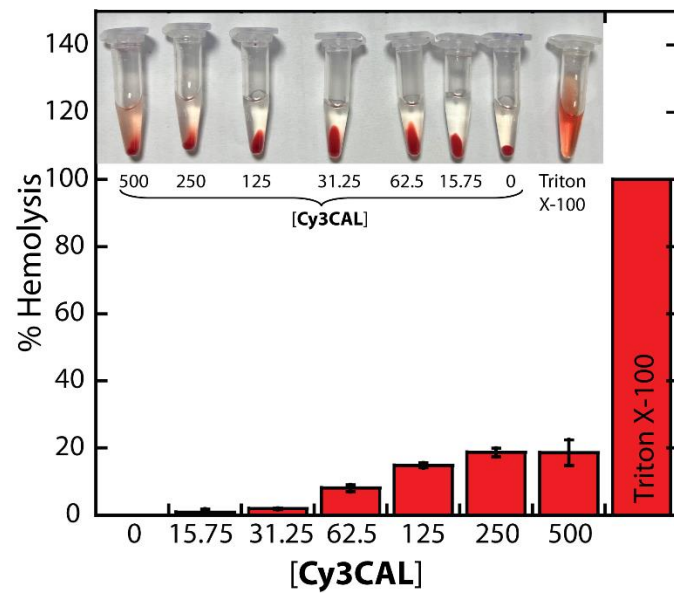

**Fig. S10.** Hemolytic activity of **Cy3CAL** at different concentrations.

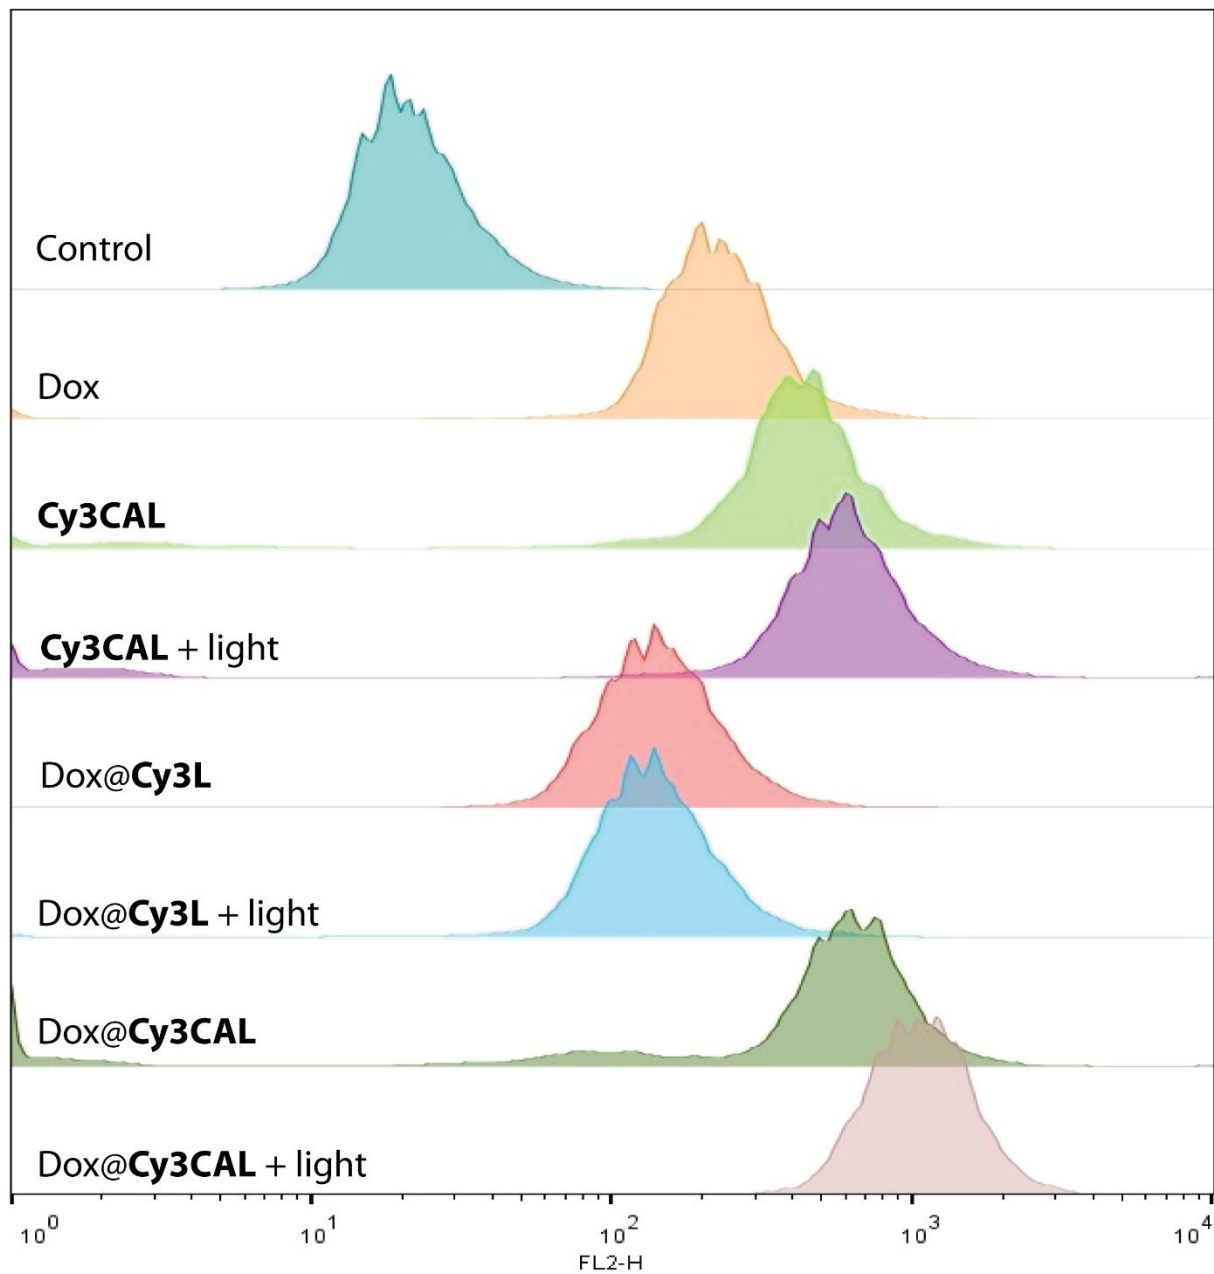

**Fig. S11.** Flow cytometry histograms after different treatments.

## Supporting Information

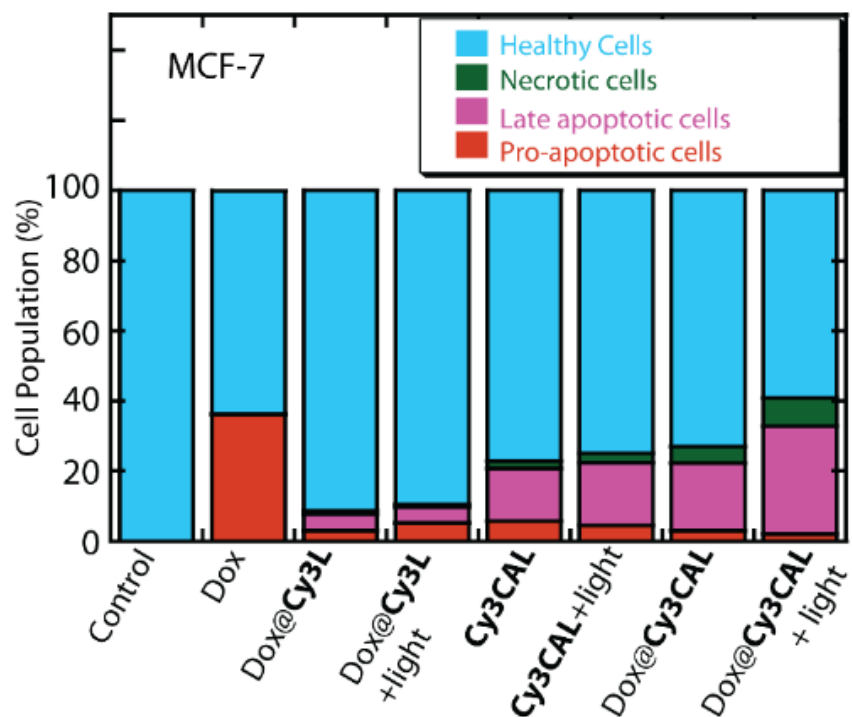

**Fig. S12.** The plot of the population of MCF-7 cells after various treatments (for 48 h).

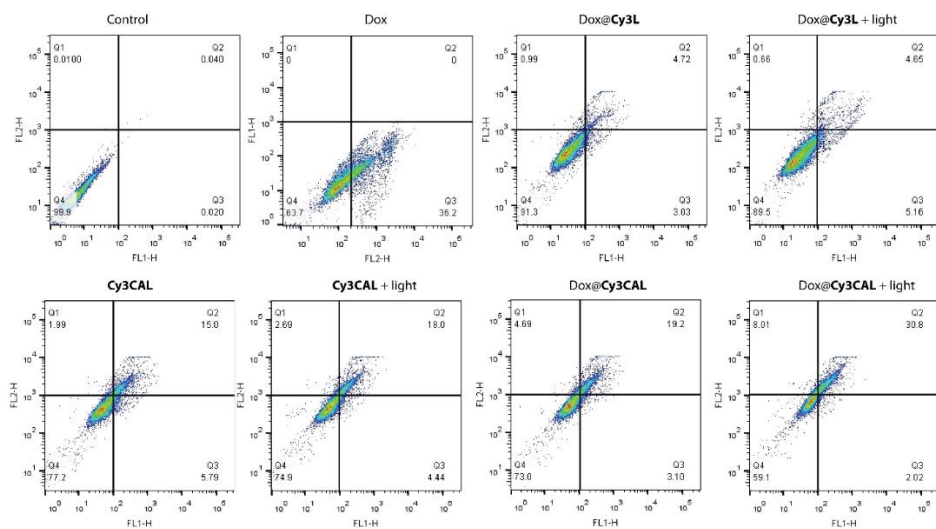

**Fig. S13.** Representative FACS data of MCF-7 cell populations after various treatments (for 48 h).

## Supporting Information

### $^1\text{H}$ NMR and $^{13}\text{C}$ NMR spectra of synthesized compounds:

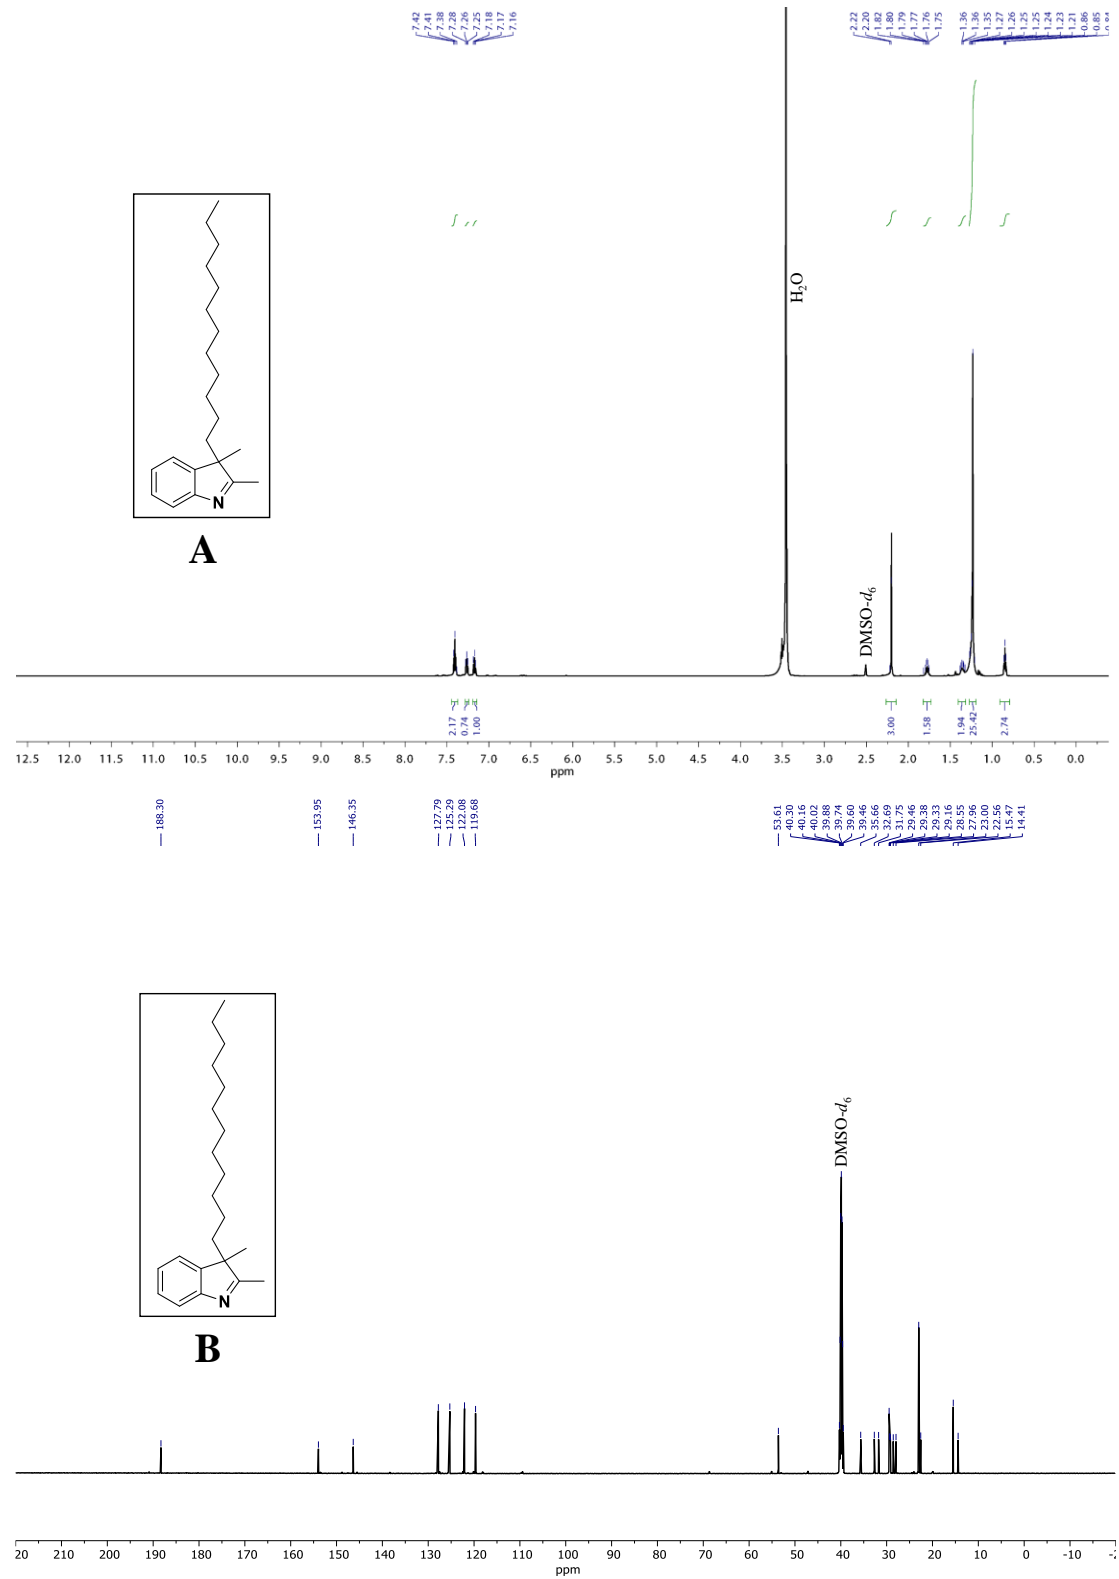

**Fig. S14.**  $^1\text{H}$  NMR (A) and  $^{13}\text{C}$  NMR (B) spectra of compound 6.



## Supporting Information

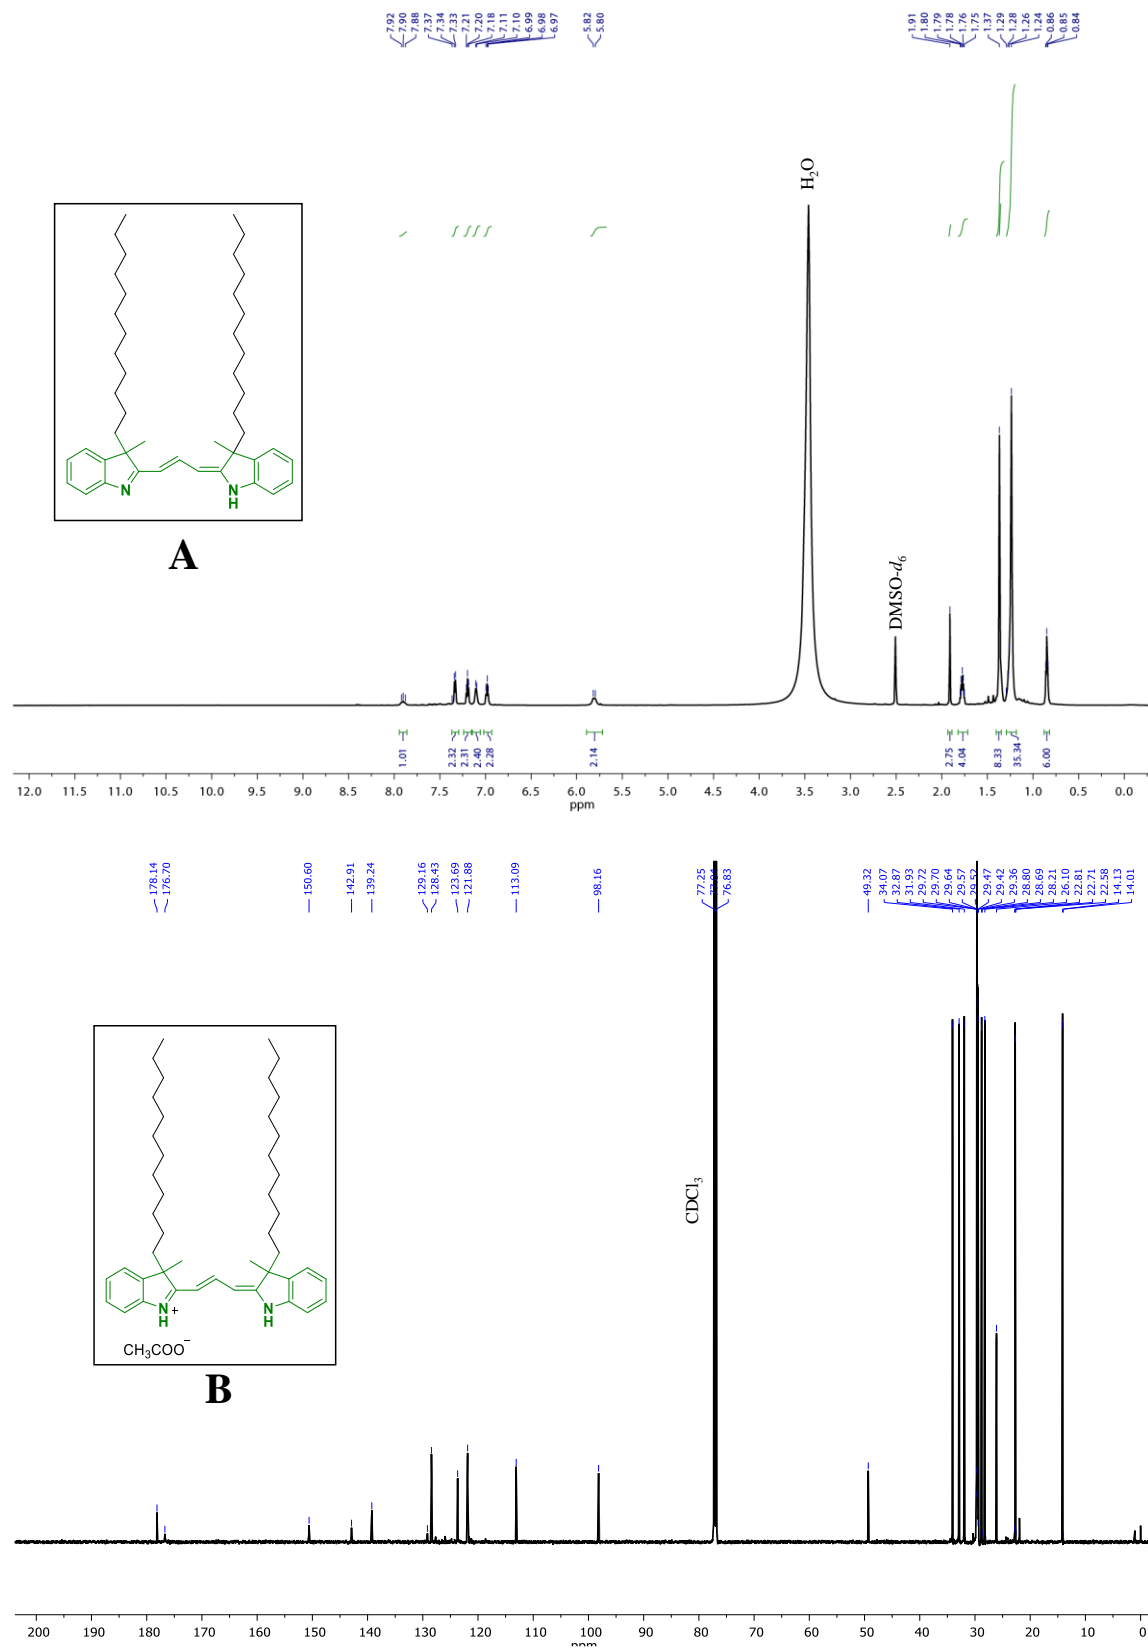

## Supporting Information

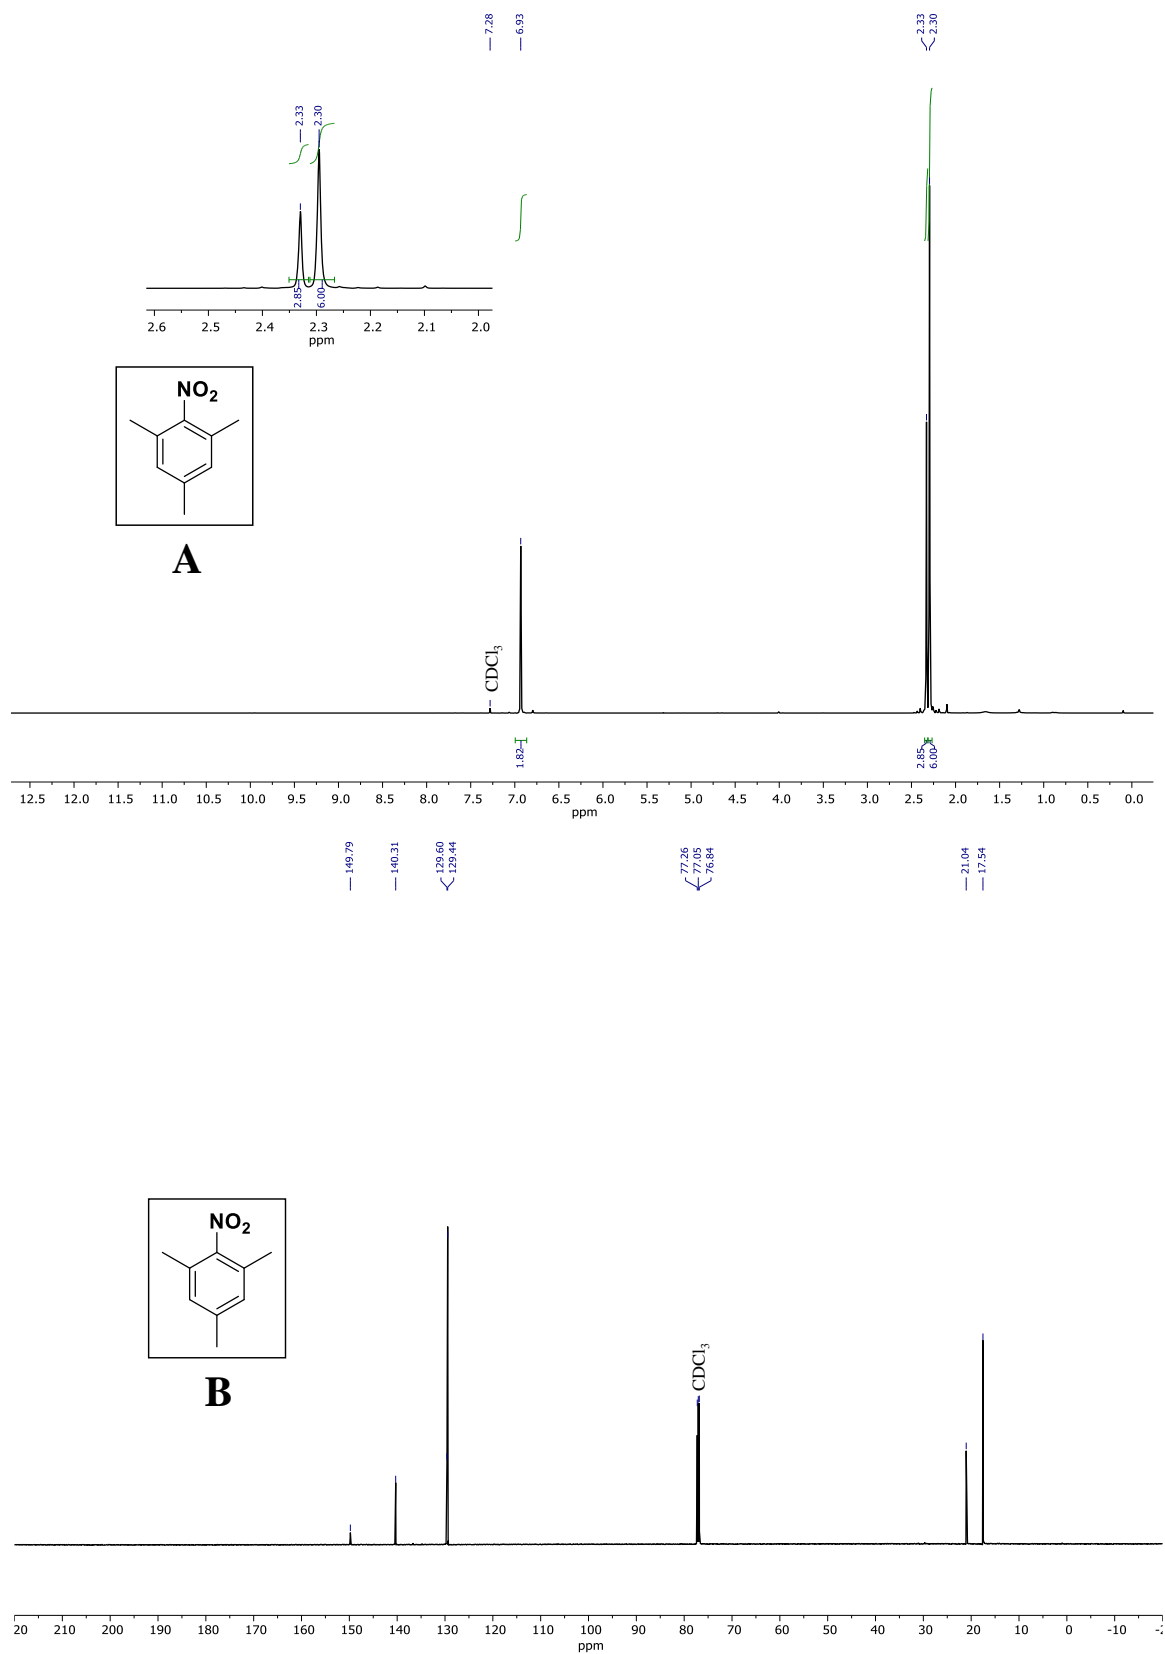

## Supporting Information

---

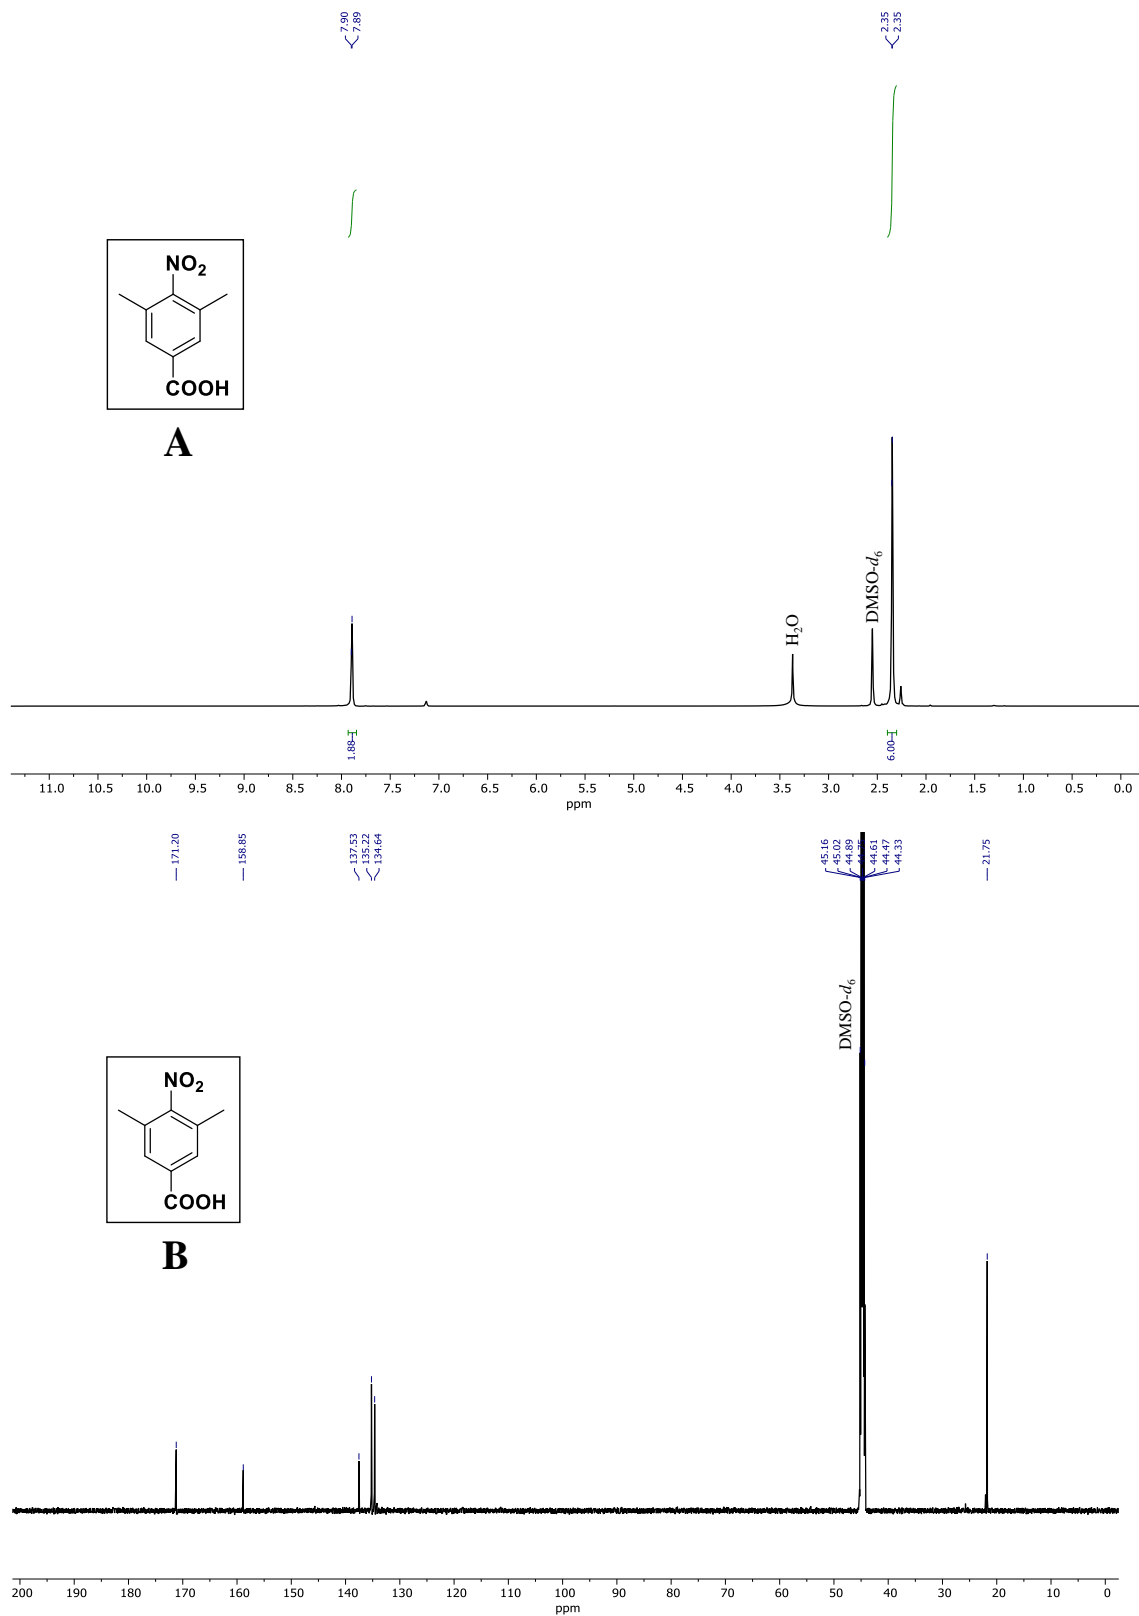

## Supporting Information

---

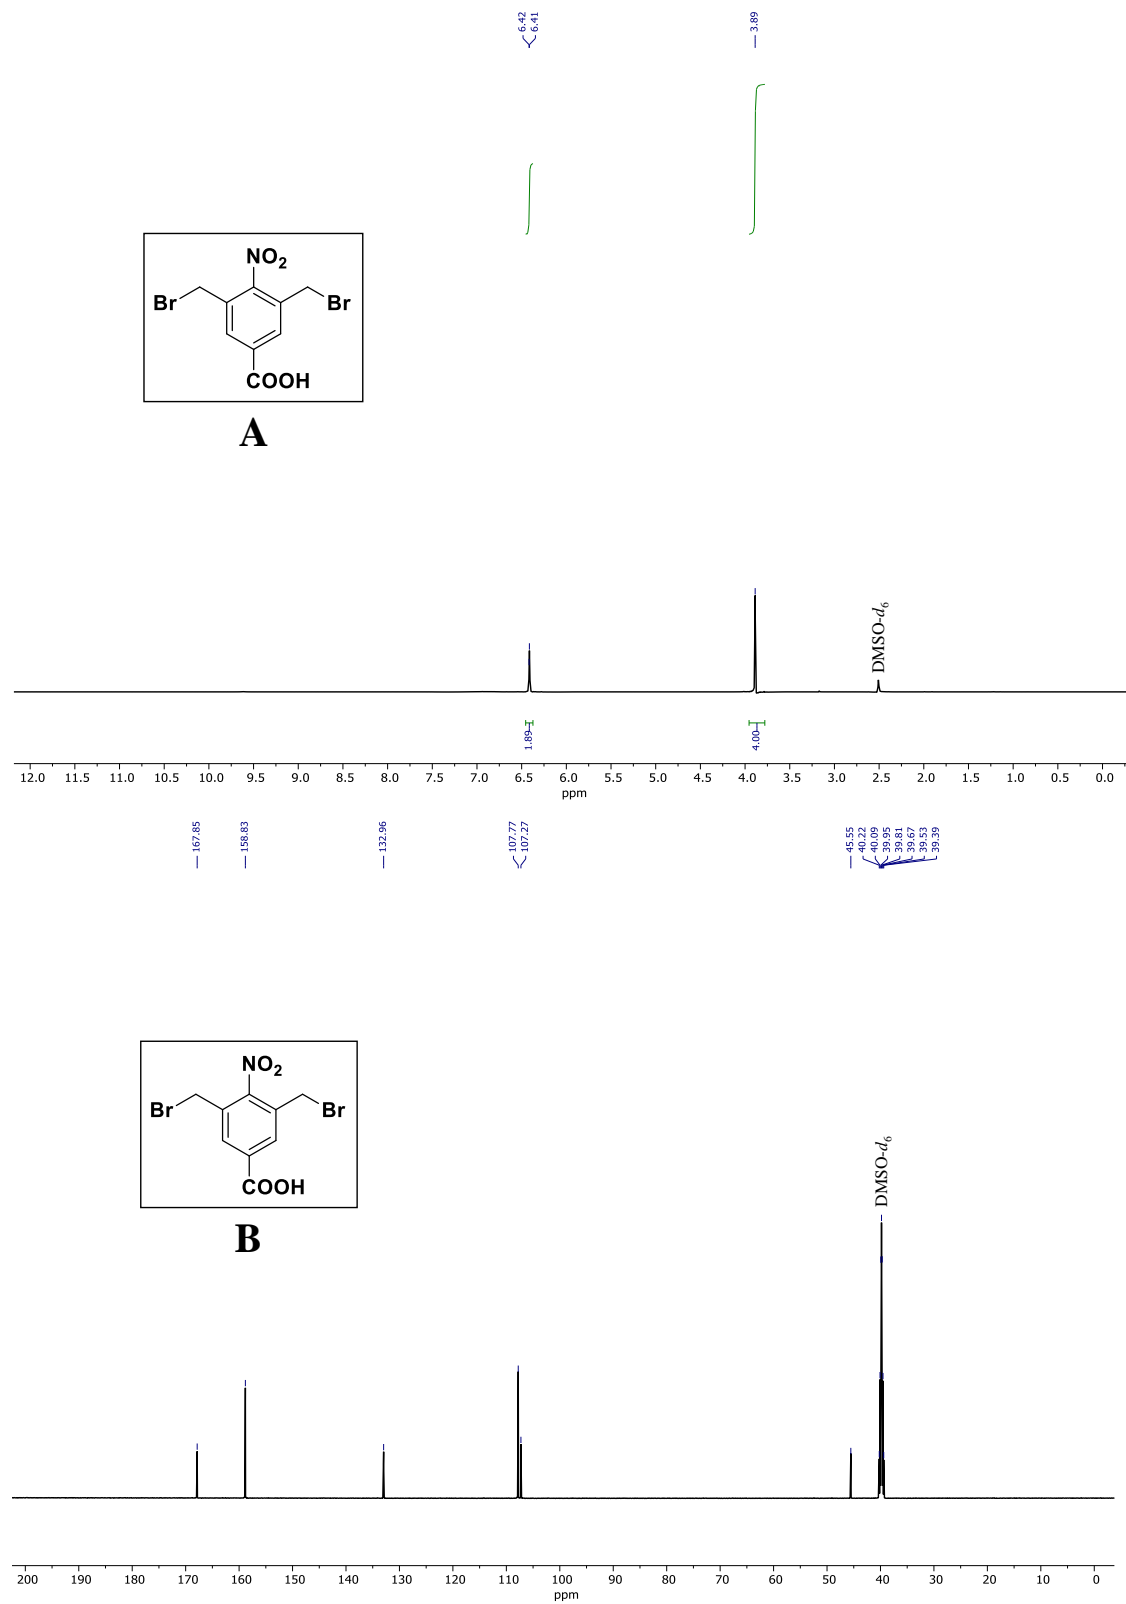

**Fig. S18.**  $^1\text{H}$  NMR (A) and  $^{13}\text{C}$  NMR (B) spectra of compound **11**.

# Supporting Information

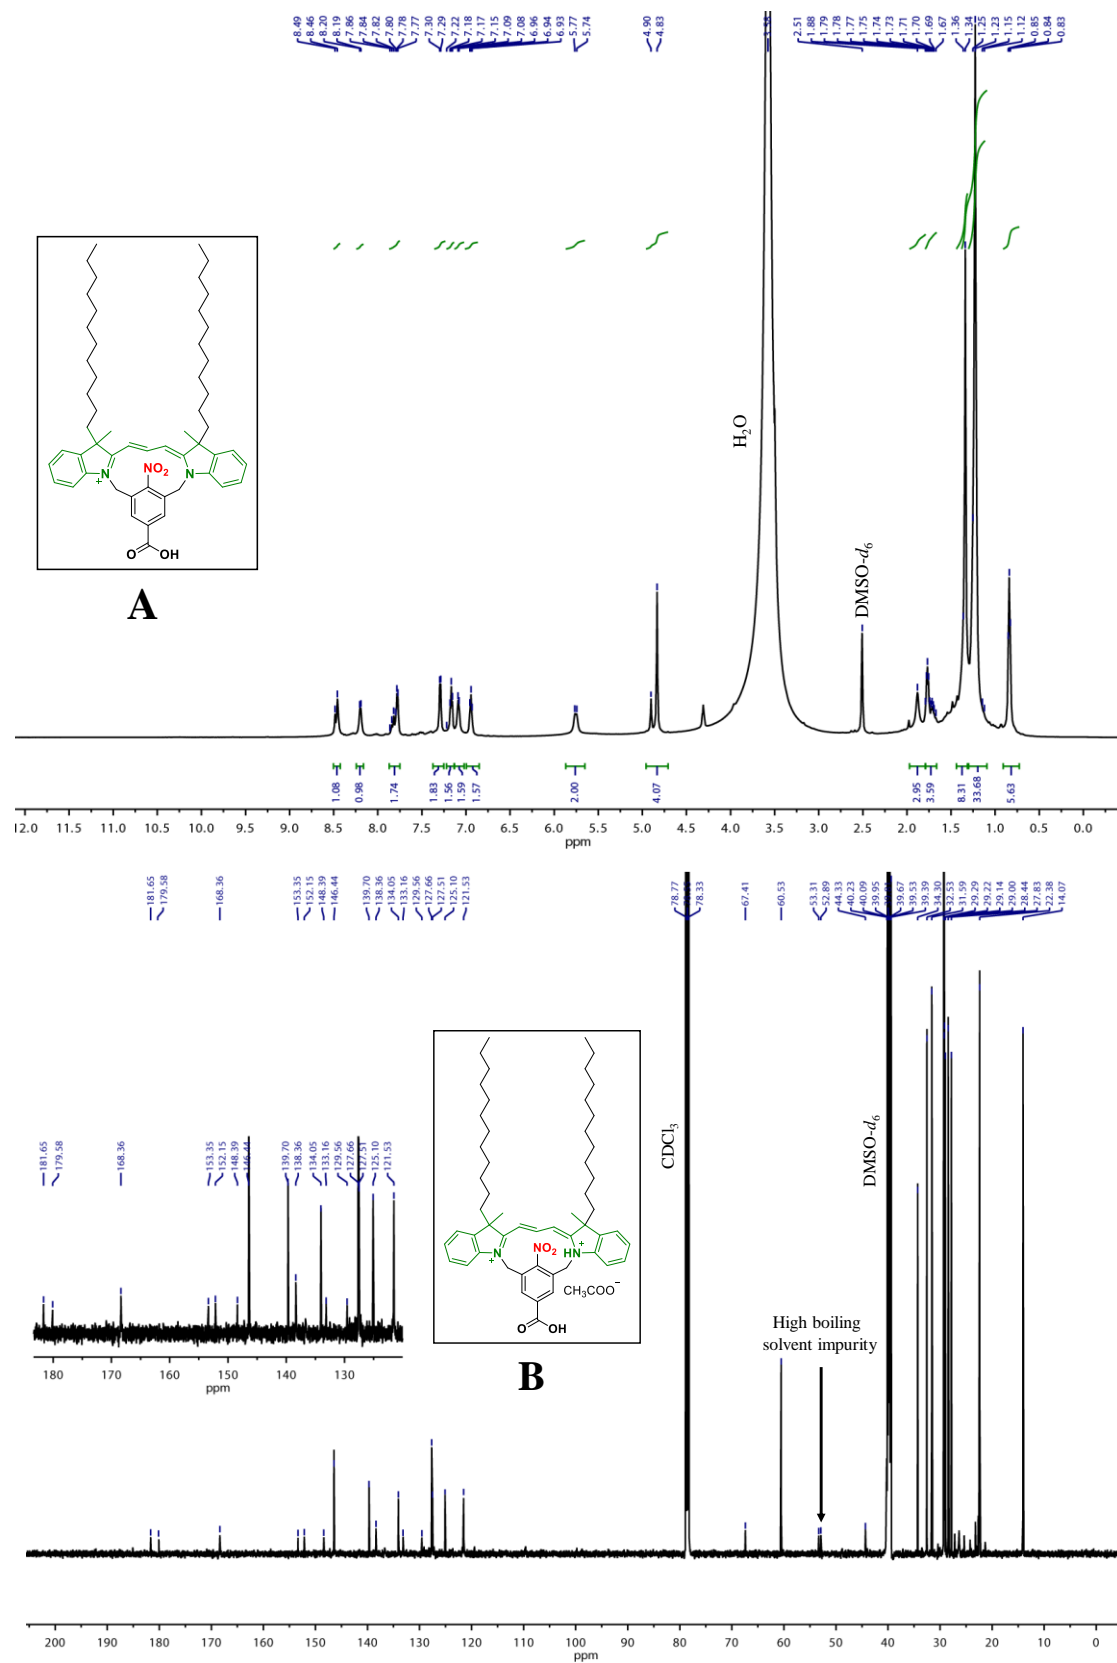

## Supporting Information

---

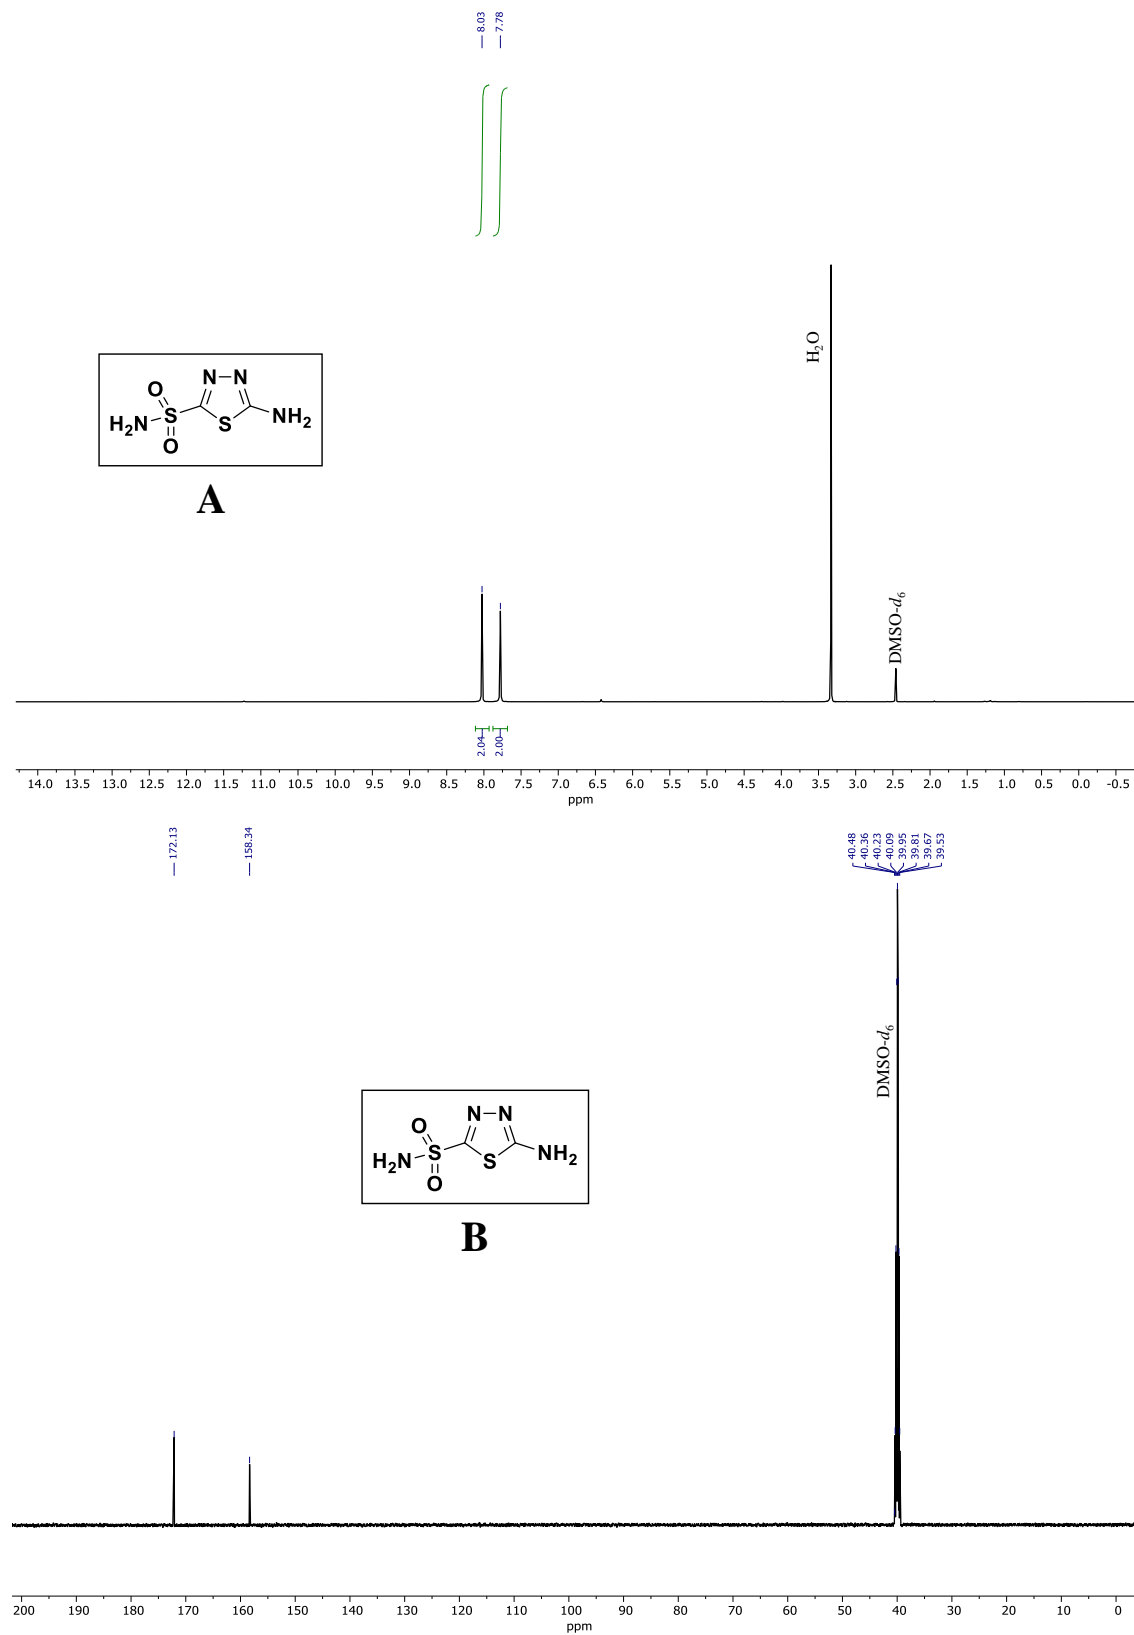

**Fig. S20.**  $^1\text{H}$  NMR (A) and  $^{13}\text{C}$  NMR (B) spectra of compound **12**.

## Supporting Information

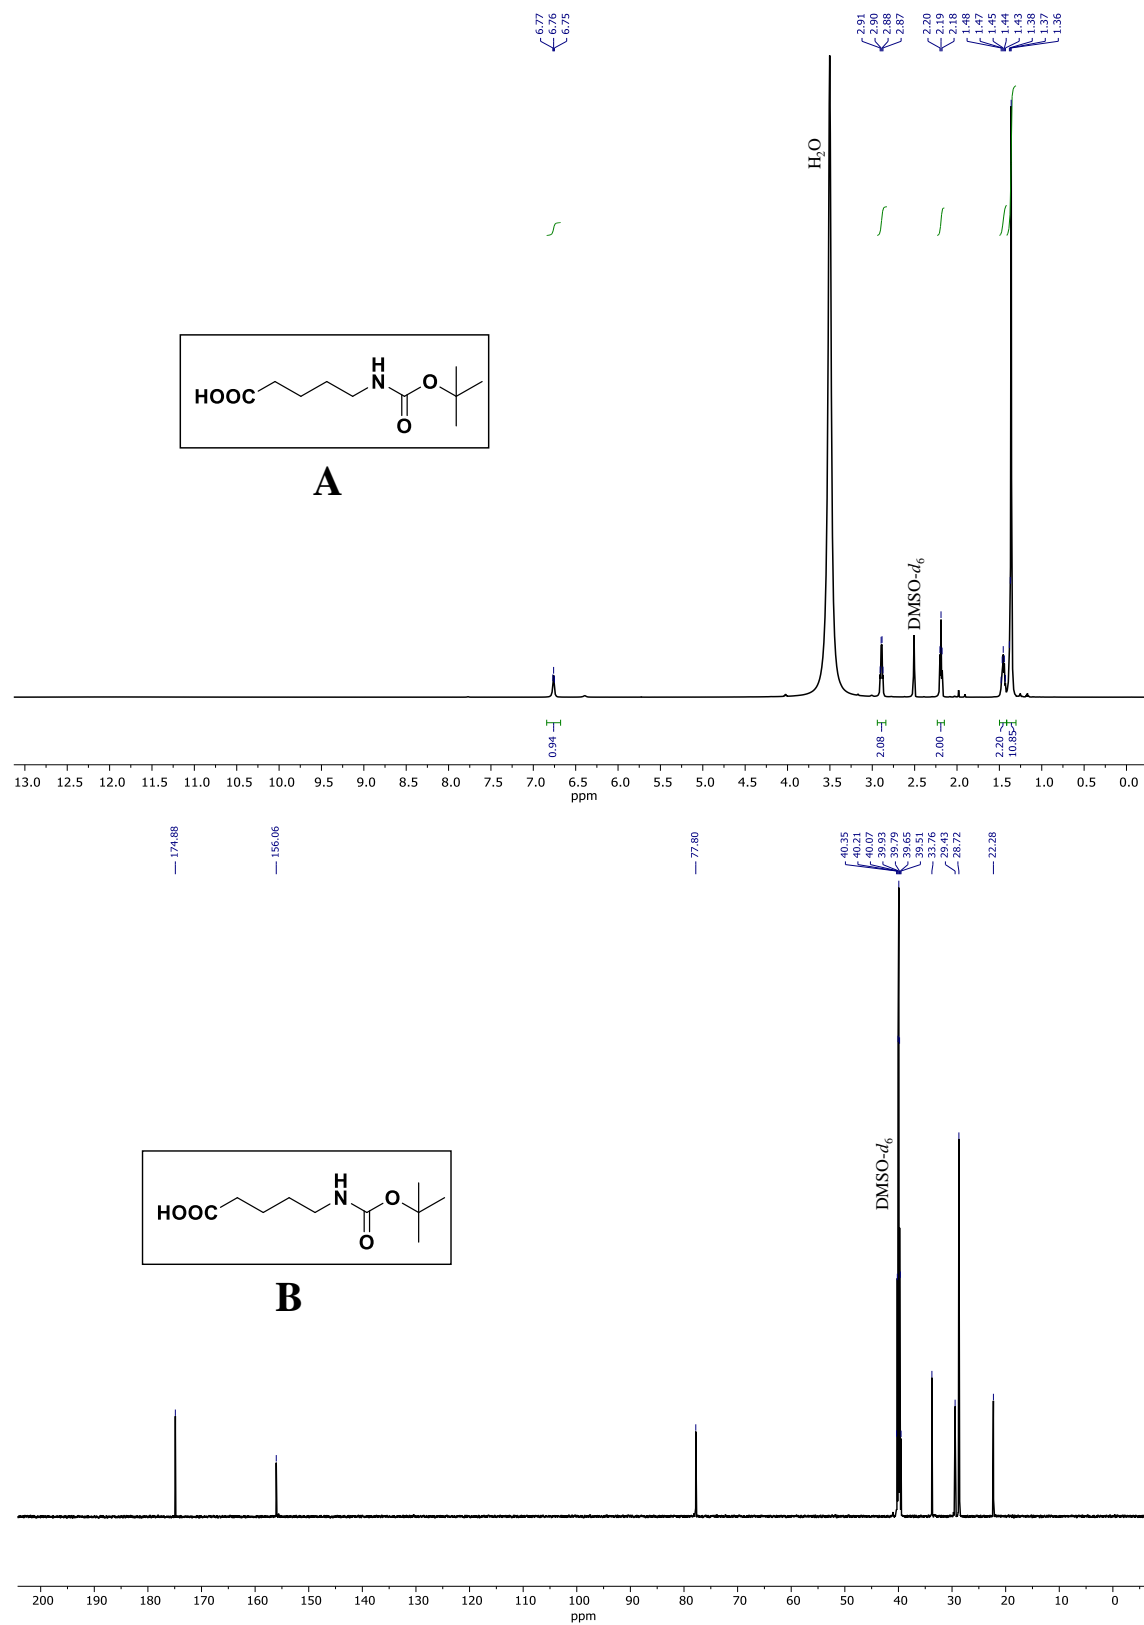

**Fig. S21.**  $^1\text{H}$  NMR (A) and  $^{13}\text{C}$  NMR (B) spectra of compound **13**.

## Supporting Information

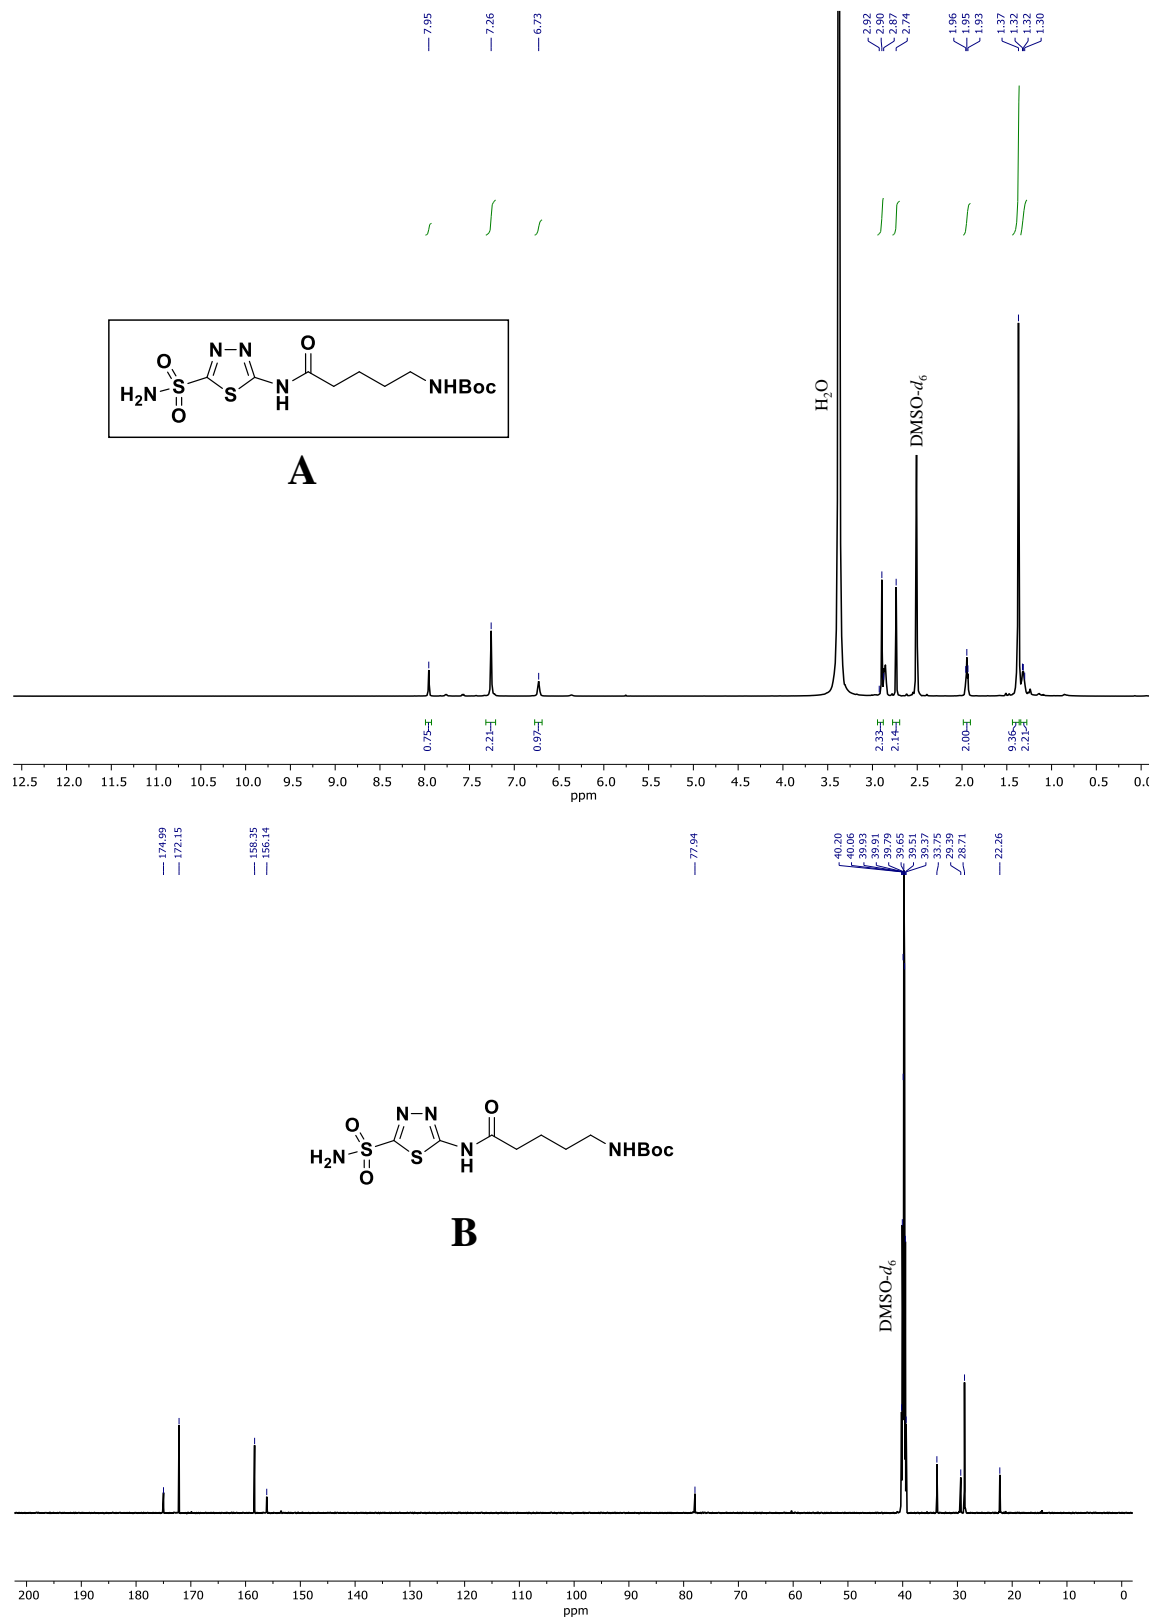

**Fig. S22.**  $^1\text{H}$  NMR (A) and  $^{13}\text{C}$  NMR (B) spectra of compound **14**.



## Supporting Information

---

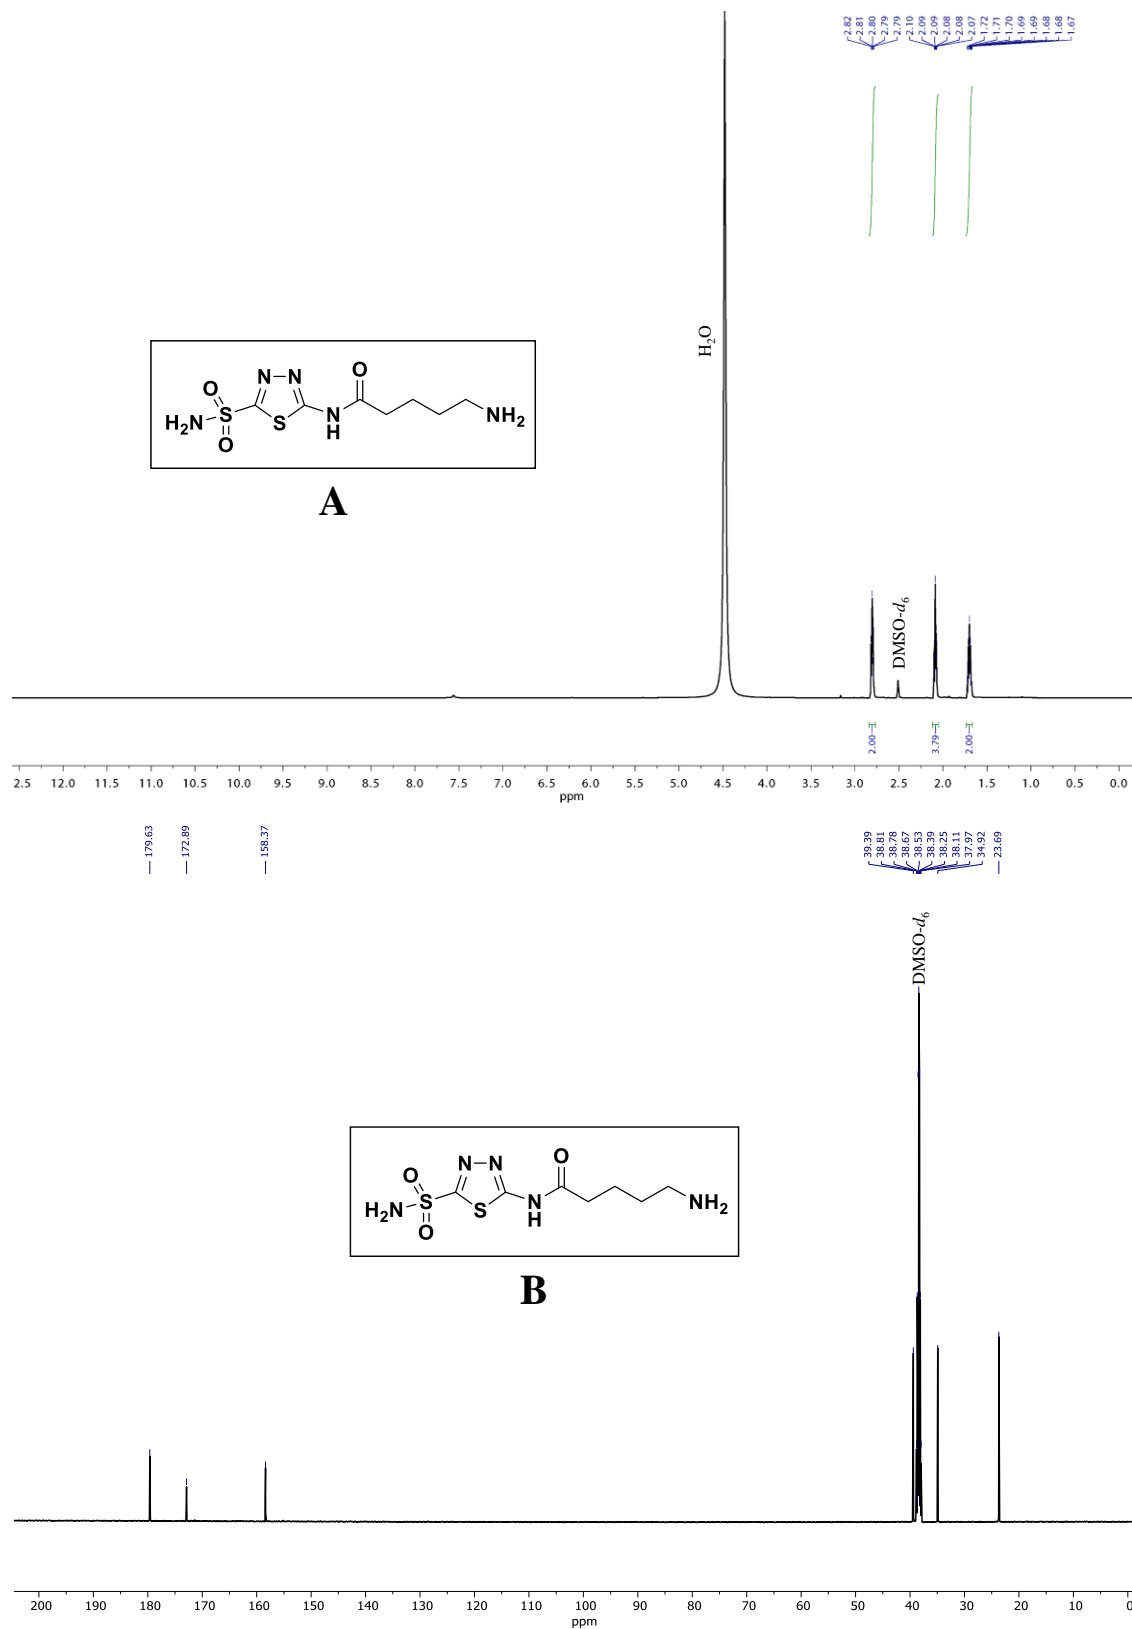

**Fig. S23.**  $^1\text{H}$  NMR (A) and  $^{13}\text{C}$  NMR (B) spectra of compound **15**.

# Supporting Information

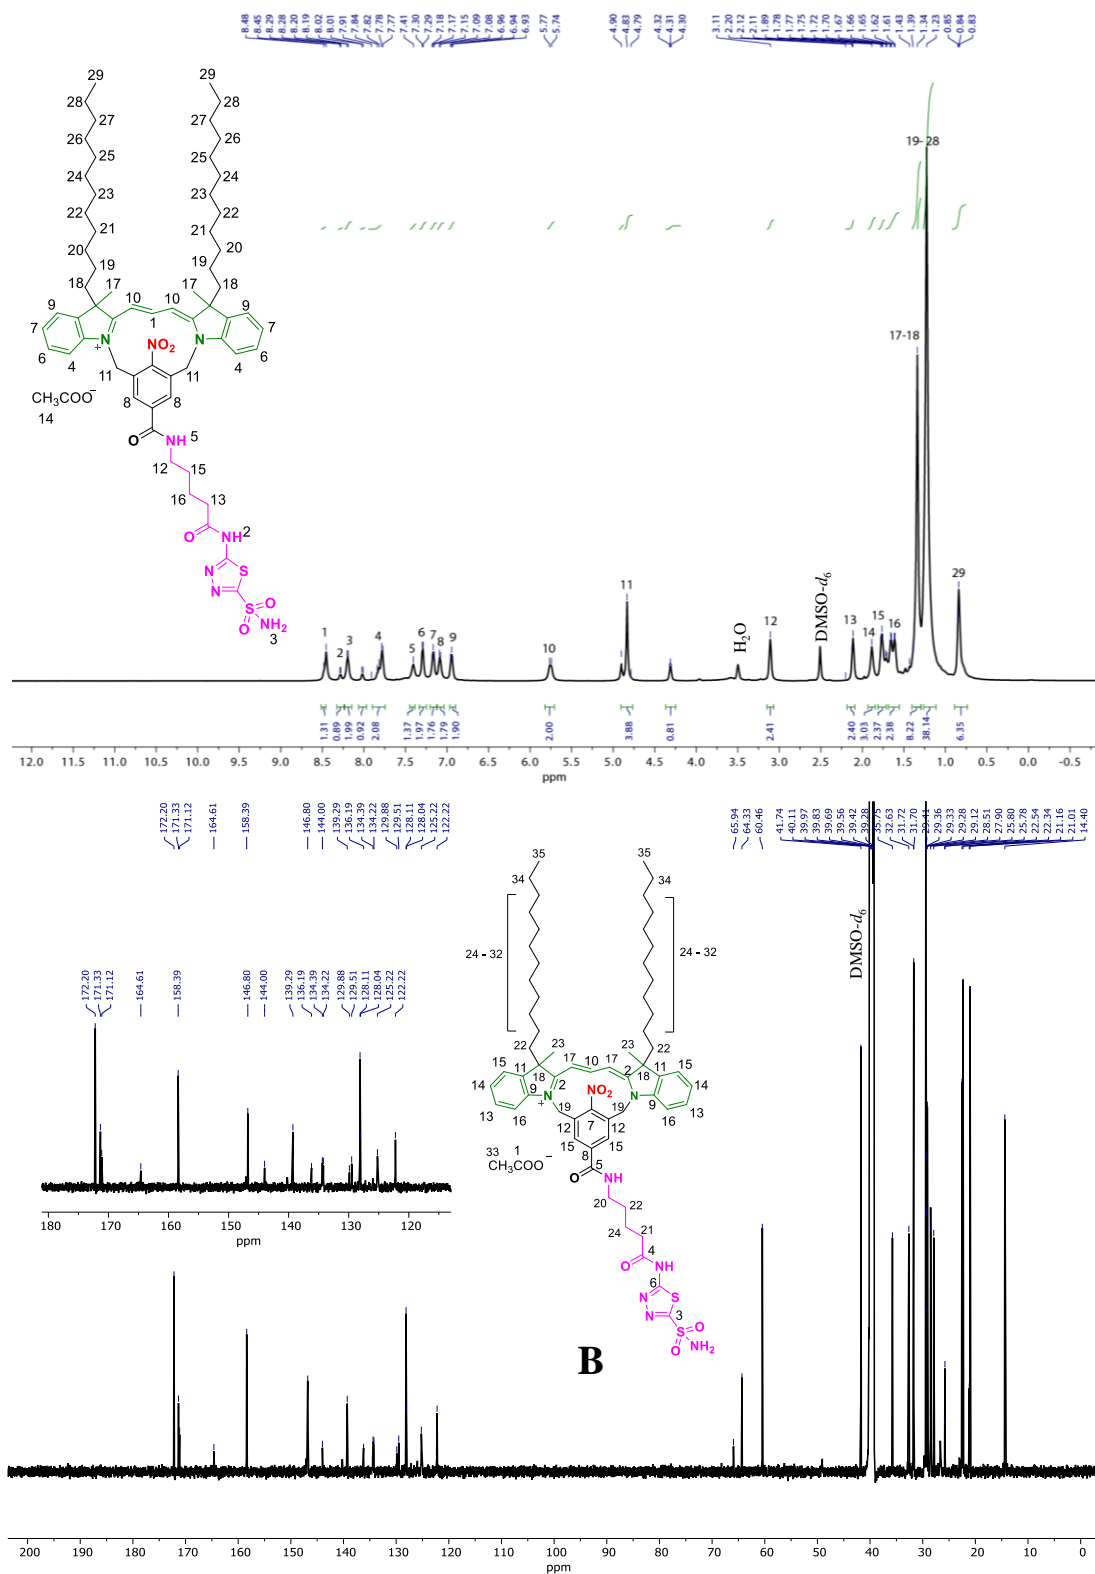

**Fig. S24.**  $^1\text{H}$  NMR (A) and  $^{13}\text{C}$  NMR (B) spectra of compound **Cy3CAL**.

# Supporting Information

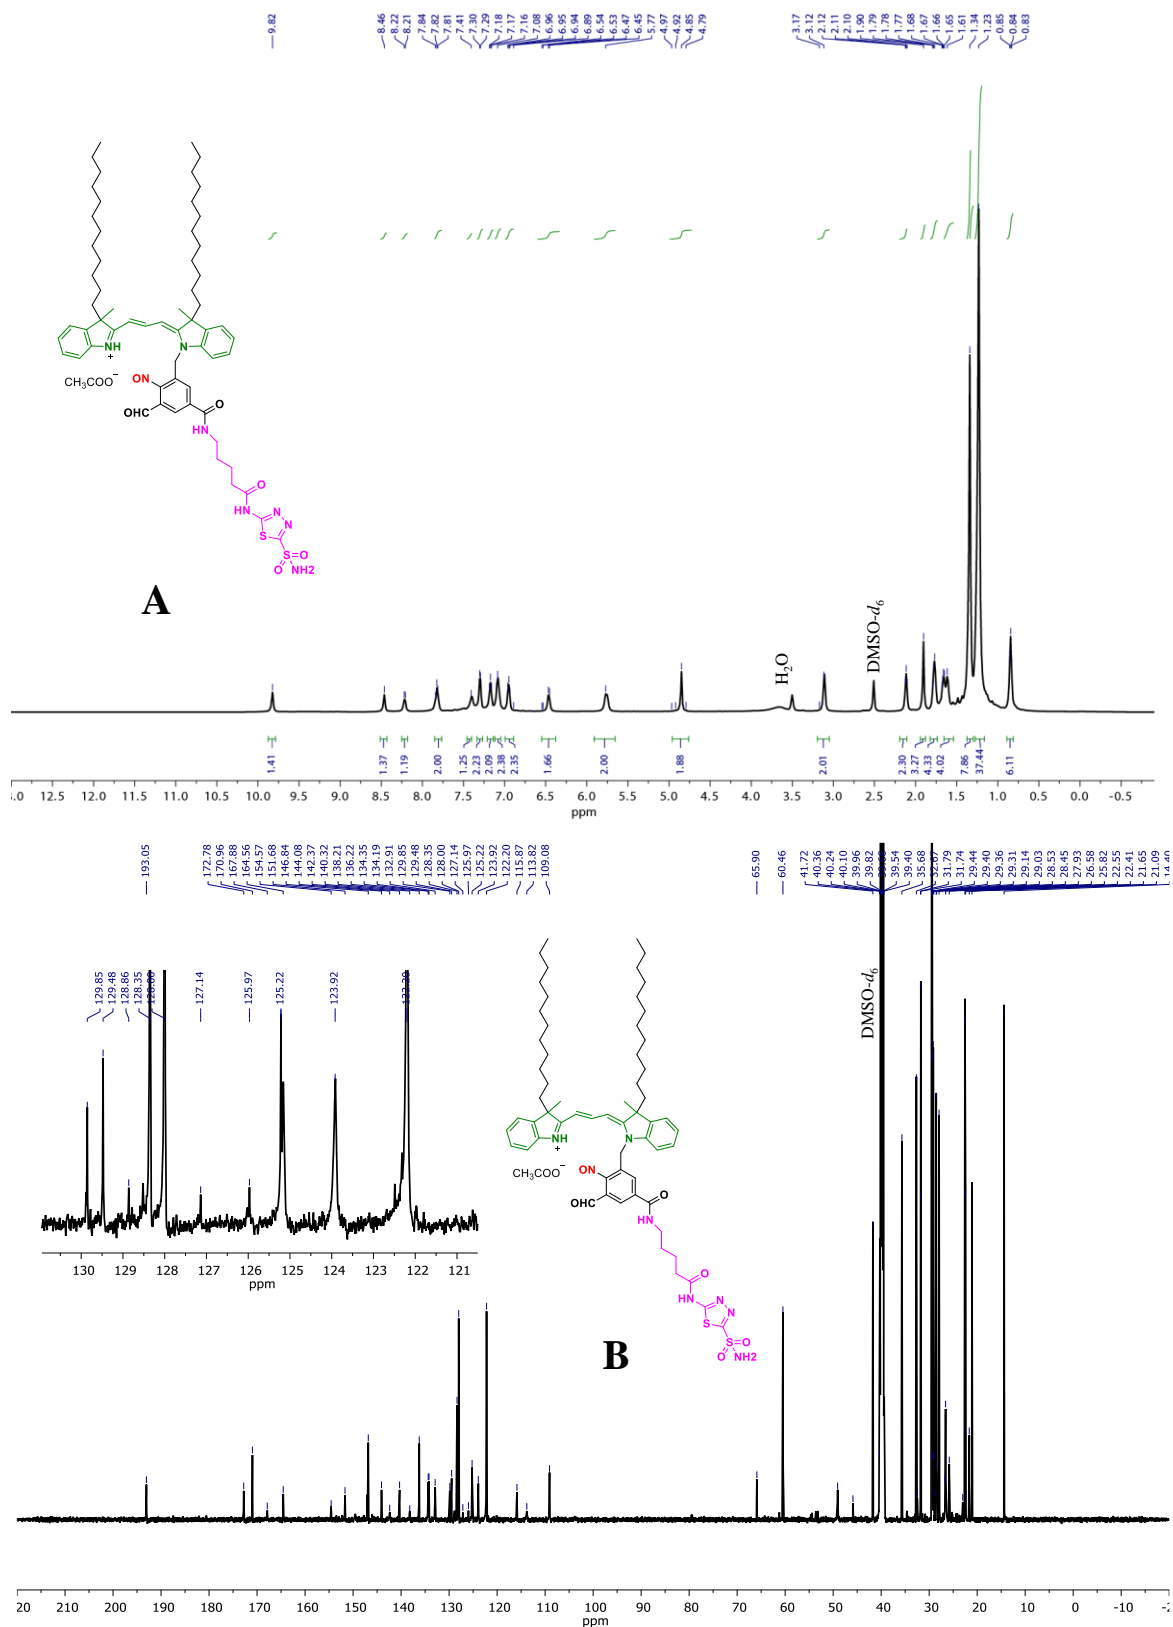

## Supporting Information

---

### Mass spectra

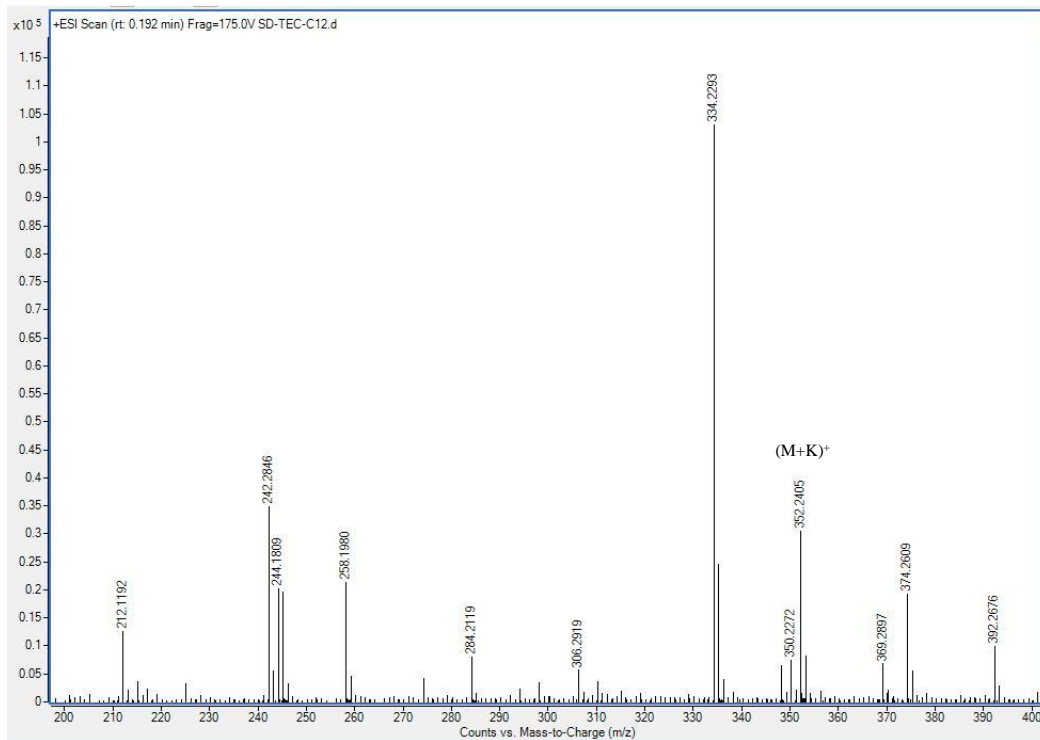

**Fig. S26.** Mass spectra of compound **6**.

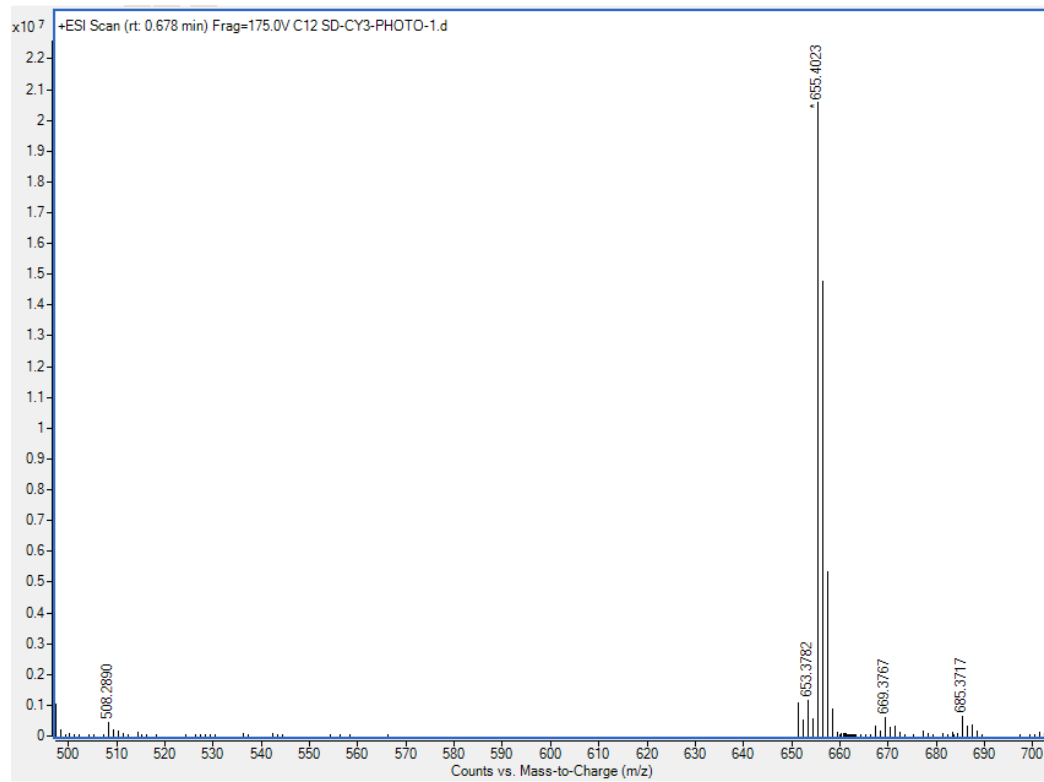

**Fig. S27.** Mass spectra of compound **7**.

## Supporting Information

---

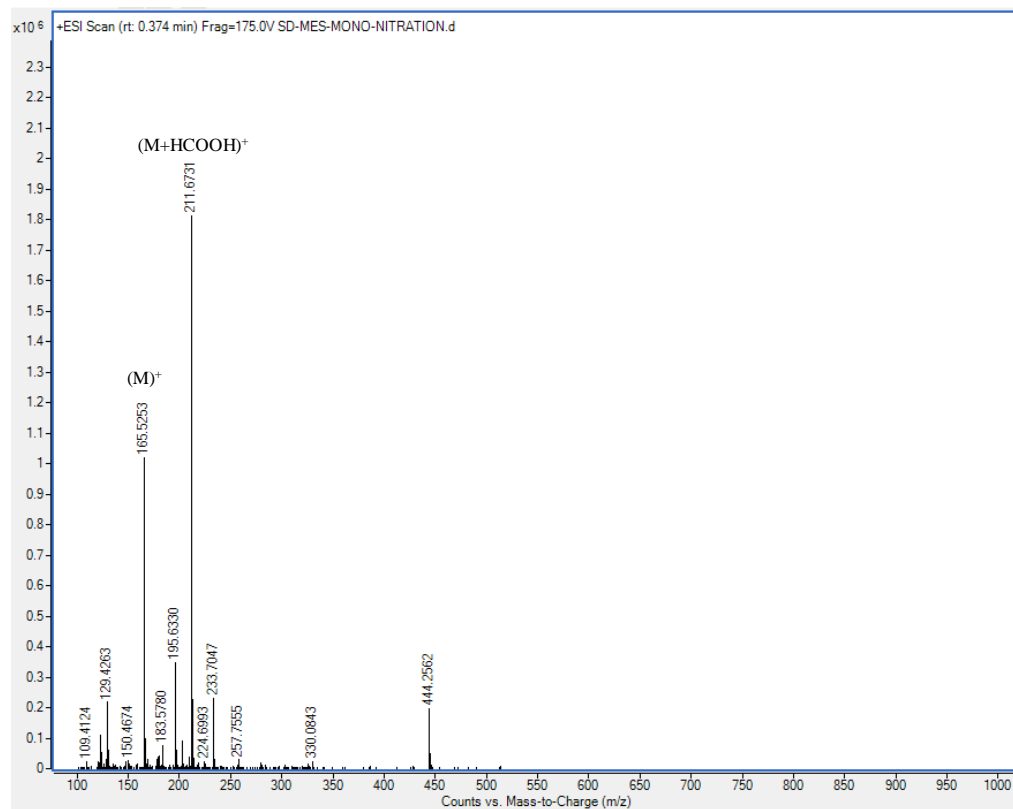

Fig. S28. Mass spectra of compound 9.

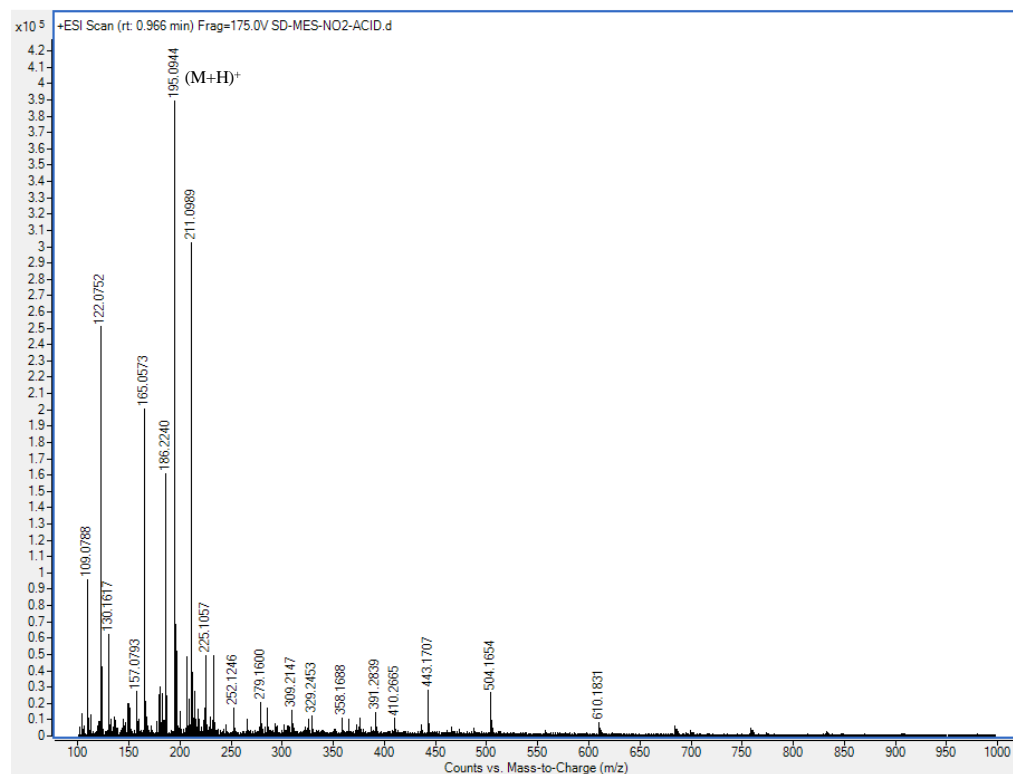

Fig. S29. Mass spectra of compound 10.

## Supporting Information

---

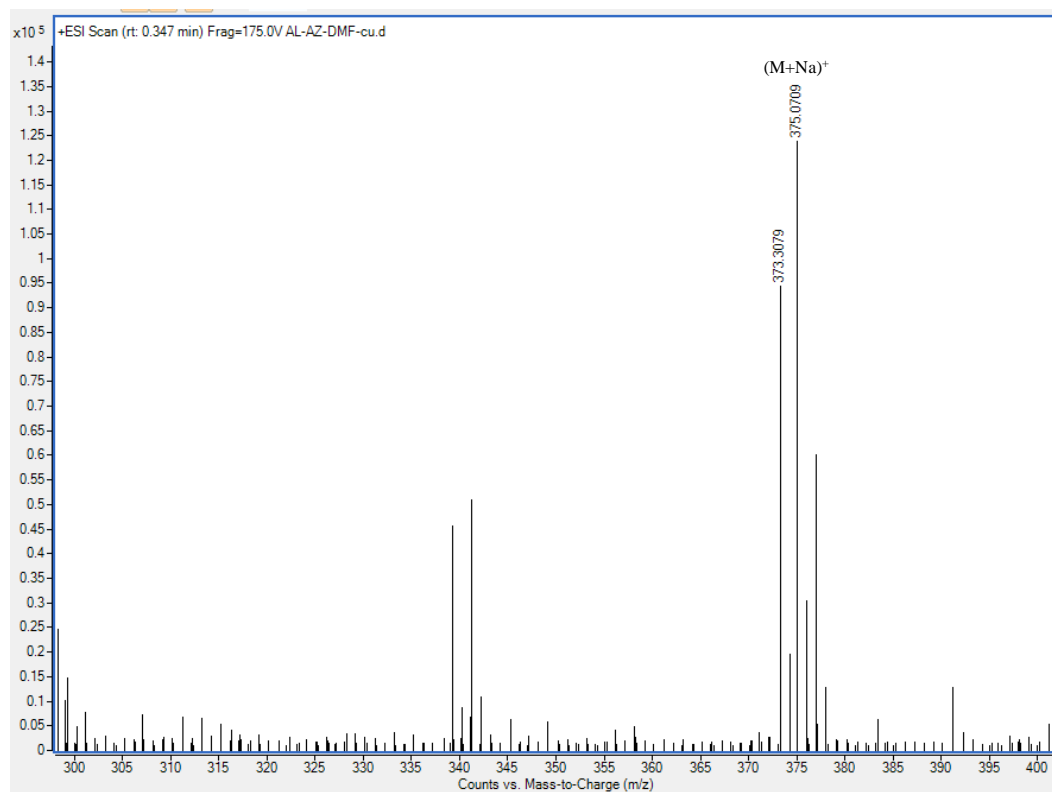

**Fig. S30.** Mass spectra of compound **11**.

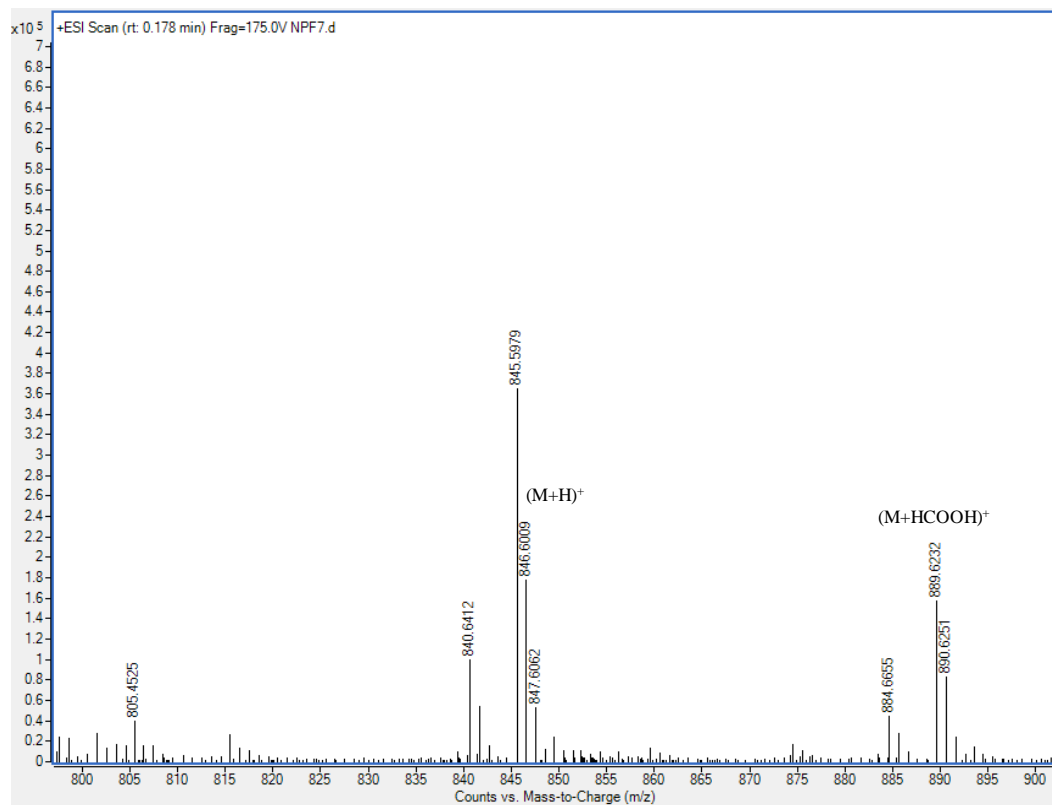

**Fig. S31.** Mass spectra of compound **Cy3L**.

## Supporting Information

---

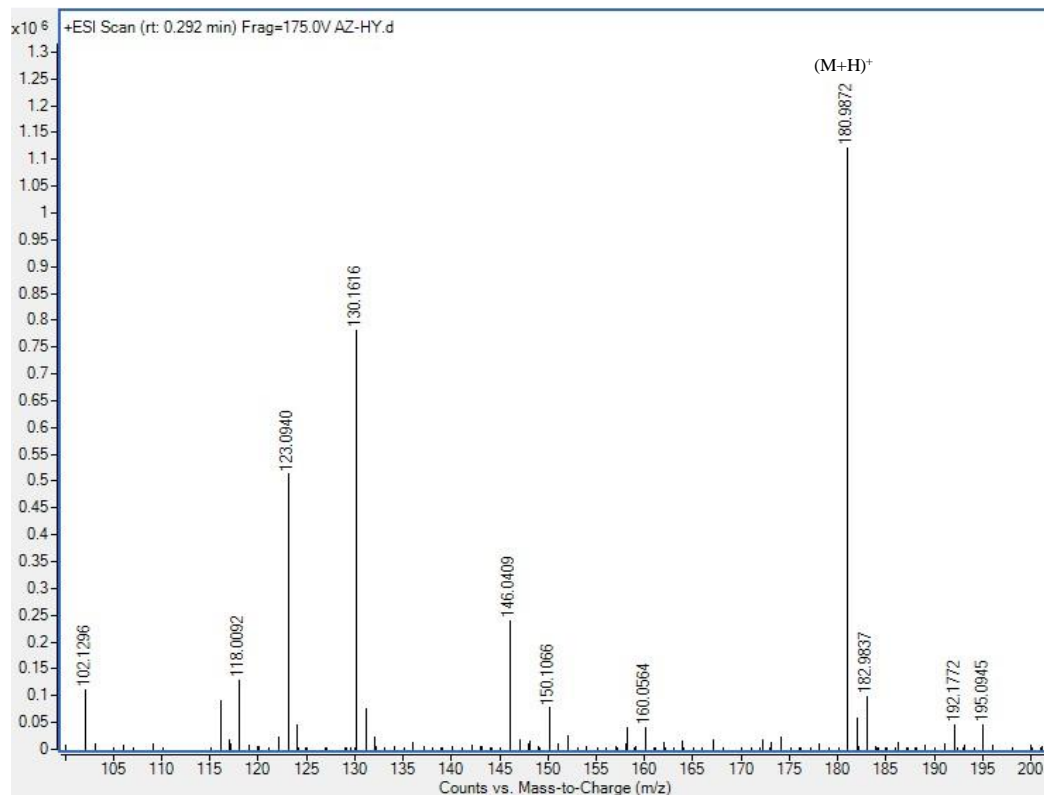

**Fig. S32.** Mass spectra of compound **12**.

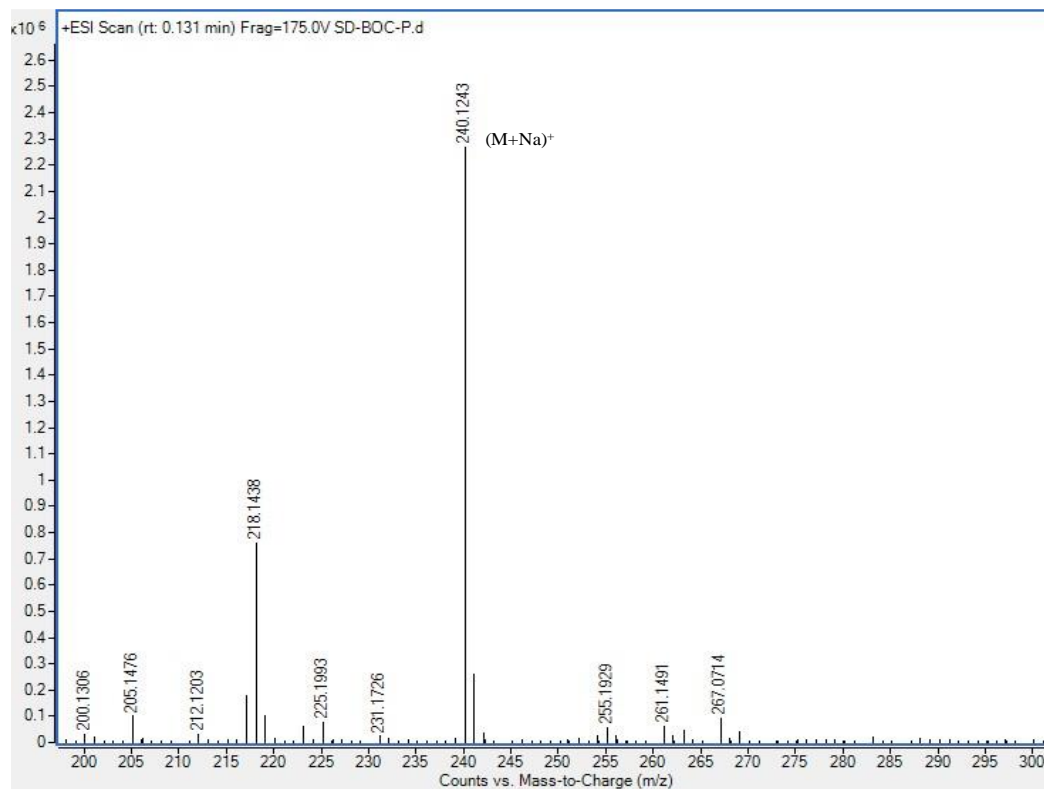

**Fig. S33.** Mass spectra of compound **13**.

## Supporting Information

---

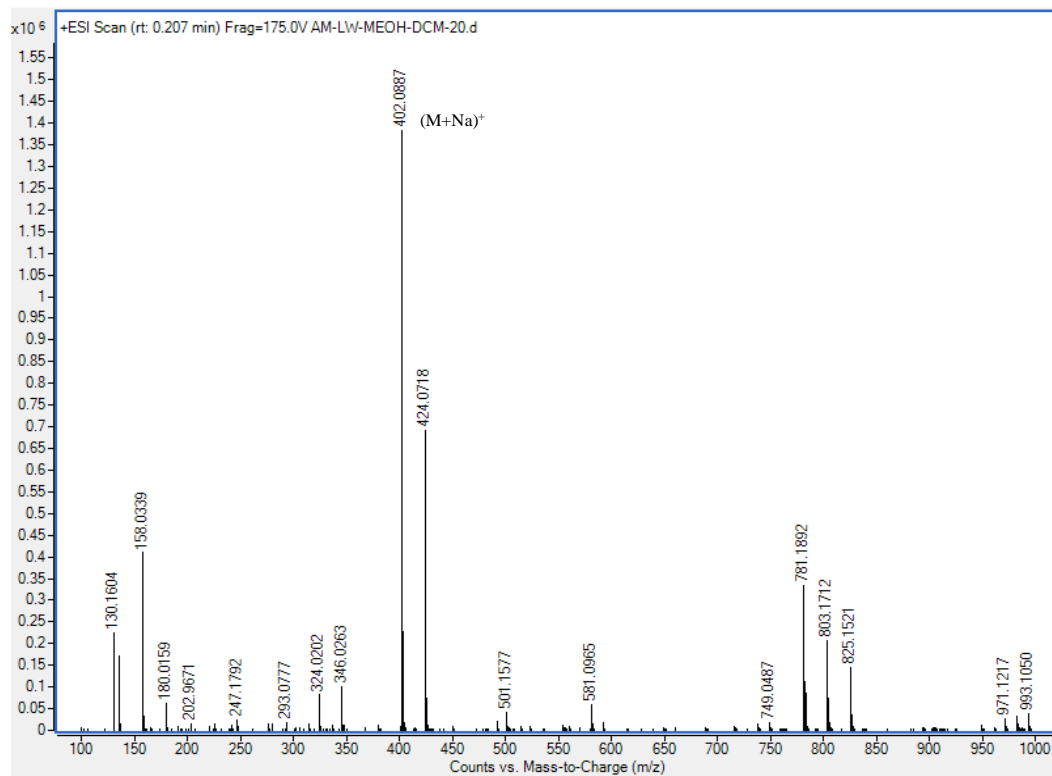

**Fig. S34.** Mass spectra of compound 14.

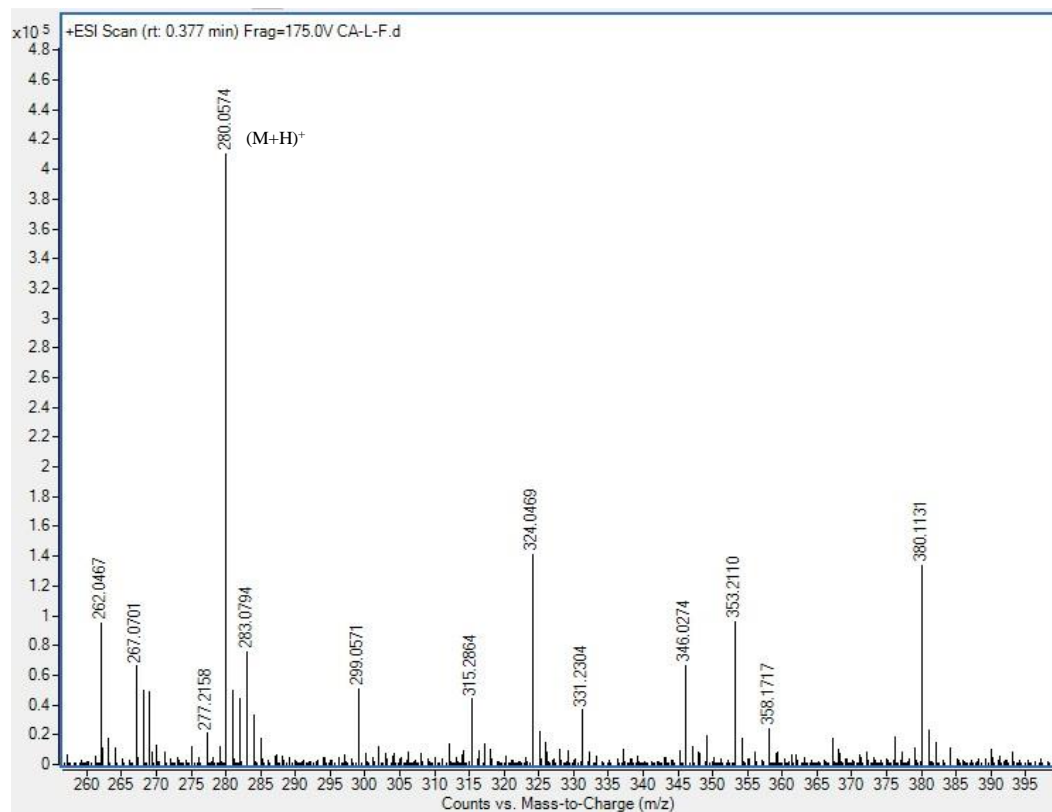

**Fig. S35.** Mass spectra of compound 15.



## Supporting Information

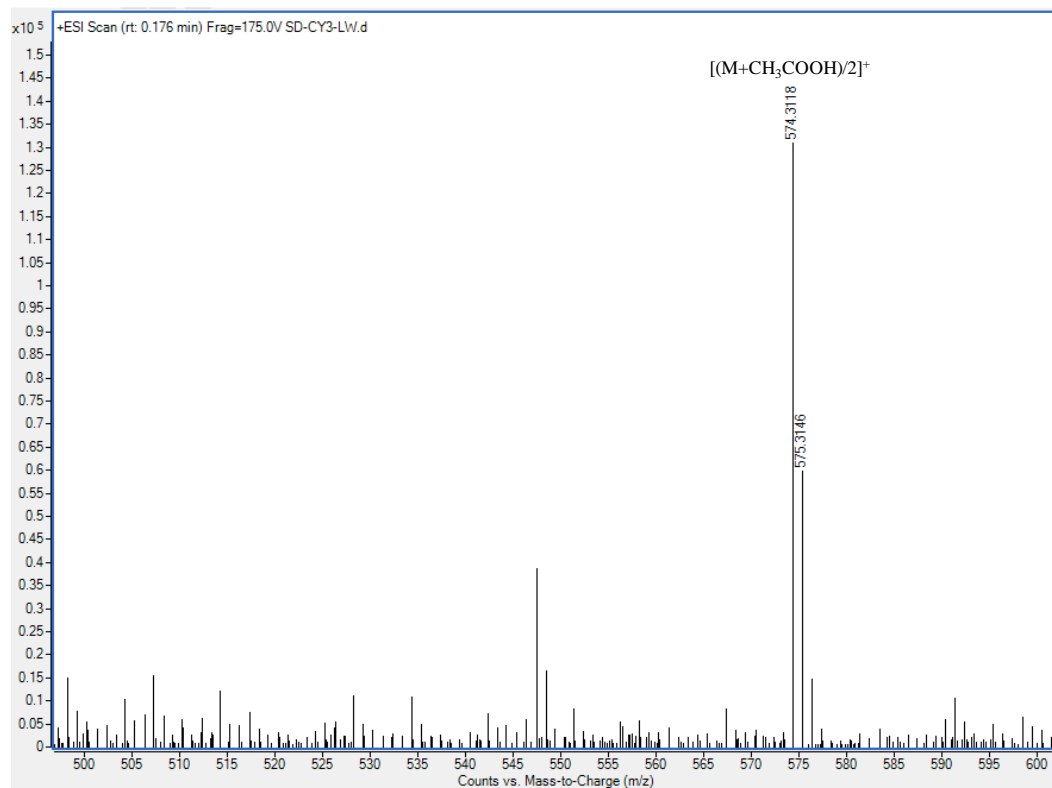

**Fig. S36.** Mass spectra of compound **Cy3CAL**.

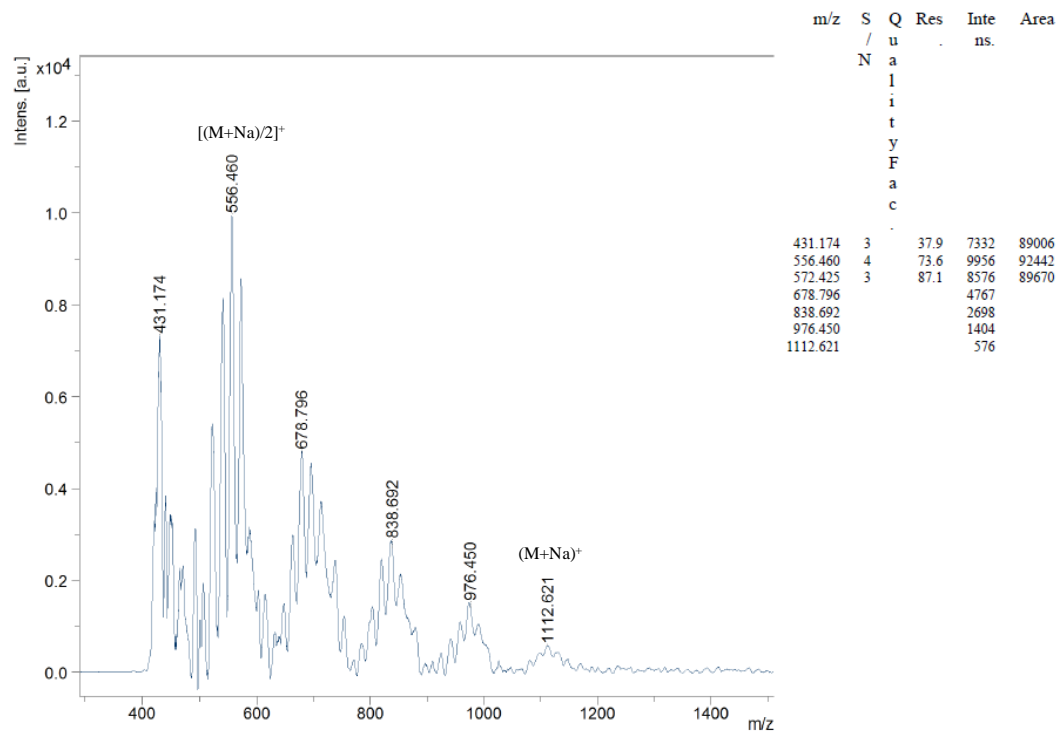

**Fig. S37.** MALDI-TOF spectra of compound **Cy3AAL**.

## Supporting Information

---

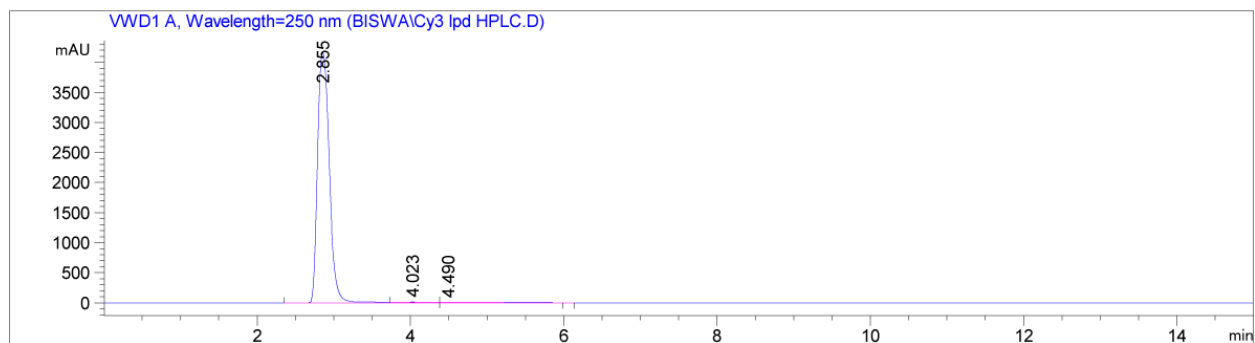

**Fig. S38.** HPLC trace of compound **Cy3CAL**.

## Reference

1. Y. V. Il'ichev, M. A. Schworer and J. Wirz, *J. Am. Chem. Soc.*, 2004, **126**, 4581-4595.
